# Supplementary material for: Descriptive analysis of frequency and antimicrobial susceptibility of pathogens isolated from acute leukemia patients with febrile neutropenia over a five-year period at a tertiary hospital
Source: Research Square preprint supplement (doi:10.21203/rs.3.rs-8193956/v1), 2025-12-13
Supplement: Supplementary file 1 [file d612382f13269c2ee41b3ef6.xlsx]

## Sheet: Sheet1
	Medical Record	DOA	DOD	Age	Gender	Diagnosis	Post Chemo	Relapse	Bone marrow transplant	Duration of Hospitalization	Duration of Disease	Severity of Neutropenia	Duration of Neutropenia	Lines	No. of Previous Admission in a year	Primary Site of Infection	Xray	CT	MRI	Ultrasound/Echo	Respiratory Panel	Meningitis/Encephalitis Panel	Ciprofloxacin	Voriconazole	Acyclovir	Cotrimoxazole/ Trimethoprim	Fluconazole	Vancomycin	Meropenem	Amikacin	Pip / Taz	Treatment Outcome	Organisms	Ampicillin	Amoxicillin/Clavulanate	Cefixime	Ceftriaxone	Cefuroxime	Piperacillin/Tazobactam	Aztreonam	Amikacin	Gentamicin	Ciprofloxacin	Levofloxacin	Cotrimoxazole/ Trimethoprim	Ertapenem	Imipenem	Meropenem	Tobramycin
3	411-09-56	2020-01-13 19:59:00	2020-01-25 13:45:00	>18 yrs	Male	ALL	Yes	Yes	No	>10 days	>6 months	<0.5	>7 days		3	Unknown	Normal						>7 days	>7 days				>7 days				Expired	Klebsiella pneumoniae	Resistant	Resistant	Resistant	Resistant	Resistant	Resistant	Resistant	Resistant	Resistant	Resistant		Resistant		Resistant	Resistant
4	294-23-55	2020-01-17 16:36:00	2020-01-28 18:39:00	<18 yrs	Female	ALL	Yes	Yes	No	>10 days	>6 months	<0.5	>7 days	CVC	>4	Unknown	Normal									Yes	Yes			<7 days		Improved	Pseudomonas aeruginosa						Sensitive	Sensitive	Sensitive	Sensitive	Sensitive				Sensitive	Sensitive
6	355-30-13	2020-01-19 23:36:00	2020-03-12 16:50:00	<18 yrs	Female	ALL	Yes	Yes	No	>10 days	<6 months	<0.5	>7 days	PICC	None	Resp. Tract	Normal	Infective		Normal	Negative		<7days			Yes	Yes	>7 days				Improved	E.Coli	Resistant	Sensitive	Resistant	Resistant	Resistant	Sensitive	Resistant	Sensitive	Sensitive	Resistant	Sensitive	Resistant	Sensitive	Sensitive	Sensitive
																																	Line+Peri: S.aureus									Sensitive		Sensitive	Resistant
7	425-98-32	2020-02-14 17:58:00	2020-02-28 13:38:00	<18 yrs	Female	ALL	Yes	No	No	>10 days	<6 months	<0.5	>7 days	PICC	>4	Resp. Tract	Infective	Infective			Coronavirus 0C43					Yes	Yes	>7 days		<7 days		Improved	Streptococcus species	Sensitive			Sensitive
8	354-12-48	2020-03-02 15:58:00	2020-03-24 12:28:00	>18 yrs	Male	ALL	Yes	Yes	No	>10 days	>6 months	<0.5	>7 days	PICC	>4		Normal							<7days				<7days		>7 days		Improved	Peri:Staphylococcus species								Sensitive	Sensitive		Resistant	Resistant
9	404-77-39	2020-03-05 16:44:00	2020-03-28 19:07:00	>18 yrs	Male	ALL	Yes	Yes	No	>10 days	>6 months	<0.5	>7 days	CVC	>4	GI Tract		Infective					>7 days			Yes	Yes	>7 days				Re admitted	Peri: E.coli	Resistant	Resistant	Resistant	Resistant	Resistant	Resistant	Resistant	Sensitive	Resistant	Resistant		Resistant	Sensitive	Sensitive	Sensitive
																																	Peri:Enterococcus Species	Resistant								Resistant
																																	Trach: S.aureus								Sensitive	Sensitive		Resistant	Sensitive
10	433-38-36	2020-04-08 17:32:00	2020-04-10 16:04:00	>18 yrs	Male	ALL	Yes	Yes	No	<5 Days	<6 months	<1	>7 days	None	None	GI Tract	Normal										Yes	<7days				Unknown	Salmonella species	Sensitive		Sensitive	Sensitive						Sensitive		Sensitive
11	584-34-68	2020-04-17 14:46:00	2020-05-05 09:04:00	<18 yrs	Female	ALL	Yes	No	No	>10 days	>6 months	<0.5	>7 days	None	>4	Skin and soft tissue		Infective						>7 days				>7 days		>7 days		Re admitted	Peri+Line:Pseudomonas aeruginosa						Sensitive	Sensitive	Sensitive	Sensitive	Sensitive				Sensitive	Sensitive	Sensitive
12	355-65-27	2020-04-20 22:40:00	2020-04-27 19:47:00	<18 yrs	Female	ALL	Yes	No	No	5-10 days	<6 months	<0.5	>7 days	PICC	1	Unknown	Normal						no	no		yes(1 month)	no	yes ( 13 days)		yes( 5 days)		Improved	Line: Staphylococcus species								Sensitive	Sensitive		Resistant	Resistant
13	294-23-55	2020-05-07 22:09:00	2020-06-14 18:00:00	<18 yrs	Female	ALL	Yes	Yes	No	>10 days	>6 months	<0.5	<7 days	PICC	>4		Normal			Normal			Yes - 6 days	No		No	No	Yes		Yes-8 days		Expired	E.coli	Resistant	Resistant	Resistant	Resistant	Resistant	Resistant	Resistant	Sensitive	Resistant	Resistant		Resistant	Resistant	Sensitive	Sensitive
																																	Staphylococcus species								Sensitive	Sensitive		Resistant	Sensitive
																																	C.tropicalis
14	521-00-19	2020-05-16 16:32:00	2020-05-22 13:58:00	<18 yrs	Male	ALL	Yes	No	No	5-10 days	<6 months	<0.5	>7 days	PICC	1	Unknown	Normal						Yes-7 days	No		Yes	No	Yes		Yes		Improved	Pseudomonas aeruginosa						Sensitive	Sensitive	Sensitive	Sensitive	Sensitive				Sensitive	Sensitive
																																	Staphylococcus species								Sensitive	Sensitive		Sensitive	Resistant
15	428-60-83	2020-05-23 22:07:00	2020-06-05 13:03:00	<18 yrs	Male	ALL	Yes	No	No	5-10 days	<6 months	<0.5	>7 days	PICC	>4	Resp. Tract	Normal	Infective					No			Yes	< 7 days	Yes		Yes		Re admitted	Klabsiella pneumoniae	Resistant	Sensitive	Sensitive	Sensitive	Sensitive	Sensitive	Sensitive	Sensitive	Sensitive	Sensitive		Sensitive		Sensitive	Sensitive
16	585-71-70	2020-05-24 23:45:00	2020-06-17 11:05:00	<18 yrs	Female	ALL	Yes	No	No	>10 days	<6 months	<0.5	>7 days	None	2	Unknown	Normal	Normal					> 7 days	No		Yes	< 7 days	Yes		Yes		Expired	Porta cath and peri: Candida guilliermondii
17	433-38-36	2020-06-28 07:43:00	2020-07-13 17:15:00	>18 yrs	Male	ALL	Yes	Yes	No	>10 days	>6 months	<0.5	>7 days	None	2	Unknown	Normal						No	No		No	> 7 days	Yes		Yes		Expired	Pseudomonas Aeroginosa						Sensitive	Sensitive	Sensitive	Sensitive	Sensitive				Sensitive	Sensitive	Sensitive
18	430-26-80	2020-07-12 21:23:00	2020-07-16 13:58:00	<18 yrs	Male	ALL	Yes	No	No	<5 Days	>6 months	<1	>7 days	PICC	>4	Resp. Tract		Infective					No	No		No	No	Yes		Yes		Improved	Acinetobacter baumannii						Sensitive		Sensitive	Sensitive	Sensitive		Sensitive		Sensitive	Sensitive
19	435-05-21	2020-07-31 10:47:00	2020-08-07 13:51:00	<18 yrs	Male	ALL	Yes	Yes	No	5-10 days	<6 months	<0.5	<7 days	PICC	2	Unknown							< 7 days	No		Yes	> 7 days	Yes		Yes		Improved	1.Staphylococcus species								Sensitive	Sensitive		Resistant	Resistant
																																	2. Candida rugosa
20	434-72-86	2020-08-24 17:24:00	2020-08-28 13:51:00	>18 yrs	Male	ALL	No	No	No	<5 Days	<6 months	<0.5	<7 days	None	1	Unknown	Normal						> 7 days	No		No	> 7 days	No		No		Improved	E.Coli	Resistant	Resistant	Resistant	Resistant	Resistant	Resistant	Resistant	Sensitive	Sensitive	Resistant		Resistant	Resistant		Resistant
21	436-36-60	2020-09-03 18:07:00	2020-09-20 06:15:00	>18 yrs	Male	ALL	Yes	No	No	>10 days	<6 months	<0.5	>7 days	None	None	Unknown	Normal						No	< 7 days		No	> 7 days	Yes		No		Expired	Klebsiella pneumoniae	Resistant	Resistant	Resistant	Resistant	Resistant	Resistant	Resistant	Sensitive	Resistant	Resistant		Resistant		Resistant	Resistant
22	400-66-58	2020-09-05 11:45:00	2020-10-04 14:38:00	<18 yrs	Male	ALL	Yes	Yes	No	>10 days	>6 months	<0.5	>7 days	PICC	None	Eye/ENT		Infective					> 7 days	> 7 days		Yes	> 7 days			Yes		Re admitted	Streptococcus mitis	Intermediate			Sensitive
																																	Line:Burkholderia cepacia											Sensitive	Sensitive			Resistant
23	356-15-64	2020-09-21 17:41:00	2020-09-24 21:27:00	<18 yrs	Female	ALL	Yes	No	No	<5 Days	<6 months	<0.5	>7 days	None	1	GI Tract							No	No		No	> 7 days			Yes		Re admitted	Tongue swab: Candida albicans
24	355-42-28	2020-09-28 13:00:00	2020-10-05 17:17:00	<18 yrs	Male	ALL	Yes	No	No	5-10 days	>6 months	<0.5	>7 days	None	>4	Resp. Tract		Infective					No	No		Yes	No	No		Yes		Unknown	Pseudomonas species											Sensitive	Sensitive			Resistant
25	355-66-37	2020-09-28 16:30:00	2020-10-02 15:36:00	<18 yrs	Female	ALL	Yes	No	No	5-10 days	>6 months	<0.5	>7 days	None	4	Lines							No	No		Yes	No	No		Yes		Re admitted	Line+Peri:Pseudomonas species											Sensitive	Sensitive			Resistant
26	400-66-58	2020-10-09 16:28:00	2020-10-26 13:58:00	<18 yrs	Male	ALL	Yes	Yes	No	>10 days	>6 months	<0.5	>7 days	PICC	1	Eye/ENT		Infective					No	> 7 days		Yes	> 7 days	Yes				Improved	Nasal tissue: Aspergillus flavus
27	356-21-90	2020-10-14 10:09:00	2020-10-18 13:58:00	<18 yrs	Female	ALL	Yes	No	No	<5 Days	<6 months	<0.5	>7 days	None	2	Unknown							< 7 days			Yes	No	Yes				Improved	Staphylococcus Aureus						Sensitive		Sensitive	Sensitive		Sensitive	Resistant
28	355-79-05	2020-11-30 16:48:00	2020-12-02 13:59:00	<18 yrs	Male	AML	Yes	No	No	<5 Days	<6 months	<1	>7 days	PICC	2	Unknown							No			Yes	No	No		Yes		Improved	Staphylococcus species						Sensitive		Sensitive	Sensitive	Sensitive	Sensitive	Resistant		Sensitive	Sensitive
29	435-47-38	2020-12-02 12:05:00	2020-12-06 13:57:00	<18 yrs	Male	ALL	Yes	No	No	<5 Days	>6 months	<1.5	>7 days	PICC	4	Unknown	Normal						> 7 days	No		Yes	No	Yes		No		Improved	STAPHYLOCOCCUS SPECIES								Sensitive	Sensitive		Sensitive	Resistant
30	356-21-90	2020-12-30 16:24:00	2021-01-01 13:57:00	<18 yrs	Female	ALL	Yes	No	No	<5 Days	>6 months	<1.5	>7 days	PICC	>4	Resp. Tract	Normal						No	No		Yes	No	No		Yes		Improved	STAPHYLOCOCCUS SPECIES								Sensitive	Sensitive	Sensitive	Sensitive	Resistant
31	439-89-67	2021-01-14 04:01:00	2021-01-18 13:55:00	<18 yrs	Male	ALL	Yes	No	No	<5 Days	>6 months	<1.5	> 7 days	PICC	3	Resp. Tract	Infective						No			Yes	No	Yes		No		Improved	STAPHYLOCOCCUS SPECIES								Sensitive	Sensitive		Resistant	Resistant
33	356-07-93	2021-04-03 09:01:00	2021-04-26 13:57:00	>18 yrs	Male	ALL	Yes	Yes	No	>10 days	>6 months	<0.5	>7 days	PICC	>4	GI Tract	Normal						> 7 days	No		No	No	No		No		Improved	Line+Peri: E.coli	Resistant	Resistant	Resistant	Resistant	Resistant	Resistant	Resistant	Resistant	Sensitive	Resistant		Resistant		Sensitive	Sensitive
34	356-40-85	2021-04-04 00:03:00	2021-04-24 10:57:00	<18 yrs	Male	ALL	Yes	No	No	>10 days	>6 months	<0.5	>7 days	PICC	>4	Resp. Tract	Infective	Infective			Negative		> 7 days	No		Yes	No					Expired	Acinetobacter Species						Resistant		Resistant		Resistant		Resistant		Resistant	Resistant
																																	Pseudomonas aeruginosa						Resistant	Sensitive	Sensitive	Sensitive	Sensitive				Sensitive	Resistant	Sensitive
35	436-37-83	2021-04-08 00:05:00	2021-04-13 13:55:00	<18 yrs	Female	ALL	Yes	Yes	No	5-10 days	>6 months	<0.5	<7 days	PICC	>4	Unknown							No	< 7 days		Yes	> 7 days			Yes		Improved	Klebsiella pneumoniae	Resistant	Resistant	Resistant	Resistant	Resistant	Sensitive	Resistant	Sensitive	Resistant	Resistant		Resistant		Sensitive	Sensitive
																																	Enterobacter species	Resistant	Resistant	Resistant	Resistant	Resistant	Sensitive	Resistant	Sensitive	Resistant	Resistant		Resistant		Sensitive	Sensitive
																																	Line: Staphylococcus species								Sensitive	Sensitive		Resistant	Resistant
36	441-05-83	2021-05-10 15:22:00	2021-05-15 13:56:00	<18 yrs	Male	ALL	Yes	Yes	No	5-10 days	>6 months	<0.5	>7 days	PICC	>4	Resp. Tract	Infective						No	No		No	> 7 days			Yes		Improved	Staphylococcus species								Sensitive	Sensitive		Sensitive	Resistant
37	583-02-44	2021-05-16 21:18:00	2021-05-26 17:33:00	<18 yrs	Female	ALL	Yes	No	No	>10 days	<6 months	<0.5	>7 days	PICC	3	Unknown				Normal			< 7 days	No		No	No			Yes		Improved	E.coli	Resistant	Resistant	Resistant	Resistant	Resistant	Resistant	Resistant	Sensitive	Sensitive	Resistant	Resistant	Resistant	Resistant	Resistant	Resistant	Resistant
																																	Candida parapsilosis
38	358-75-98	2022-06-13 23:01:00	2022-06-14 21:24:00	<18 yrs	Female	ALL	Yes	Yes	No	<5 Days	>6 months	<0.5	>7 days	None	None	GI Tract	Infective											Yes				Unknown	E.coli	Resistant	Resistant	Resistant	Resistant	Resistant	Sensitive	Resistant	Sensitive	Sensitive	Resistant		Resistant	Sensitive	Sensitive	Sensitive
39	436-37-83	2021-05-26 00:06:00	2021-06-11 13:15:00	<18 yrs	Female	ALL	Yes	Yes	No	>10 days	>6 months	<0.5	>7 days	PICC	>4	Unknown	Infective	Infective					> 7 days	> 7 days		Yes	> 7 days			Yes		Re admitted	E.coli	Resistant	Resistant	Resistant	Resistant	Resistant	Resistant	Resistant	Sensitive	Resistant	Resistant		Resistant		Sensitive	Sensitive
																																	Staphylococcus species								Sensitive	Sensitive		Sensitive	Resistant
40	357-16-17	2021-05-30 11:07:00	2021-07-18 20:45:00	<18 yrs	Male	ALL	Yes	No	No	>10 days	<6 months	<1.5	>7 days	None	None	UTI	Infective	Infective		Infective								Yes				Improved	Urine:P.aeruginosa						Resistant	Resistant	Sensitive	Resistant	Resistant				Resistant	Resistant	Sensitive
																																	Line: Staphylococcus species								Sensitive	Sensitive		Resistant	Resistant
																																	Peri: Staph.aureus								Sensitive	Sensitive		Resistant	Resistant
																																	Urine:Candida.auris
																																	Enterococcus species	Resistant								Resistant
41	441-05-83	2021-06-26 21:18:00	2021-07-01 13:52:00	<18 yrs	Male	ALL	Yes	Yes	No	<5 Days	>6 months	<0.5	>7 days	PICC	>4	Line							>7 days	No	No	Yes	No	?		Yes	?	Improved	Line:Staphylococcus species								Sensitive	Sensitive			Resistant
																																	Line+Peri:Cornyae species										Resistant
42	357-28-70	2021-07-01 15:21:00	2021-07-10 13:57:00	<18 yrs	Female	ALL	Yes	No	No	5-10 days	<6 months	<0.5	>7 days	None	None	Unknown	Normal															Improved	Acinetobacter species						Sensitive		Sensitive	Sensitive	Sensitive		Sensitive		Sensitive	Sensitive
																	Infective															Improved	Aerococcus species	Resistant														Resistant
43	357-02-36	2021-07-07 16:19:00	2021-07-24 13:52:00	<18 yrs	Male	ALL	Yes	No	No	>10 days	>6 months	<0.5	>7 days	PICC	4	GI Tract/Resp. Tract/Line	Infective															Improved	1.Staphylococcus species								Sensitive	Sensitive		Sensitive	Resistant
																																	2.Entercoccus species	Resistant								Sensitive
44	357-40-64	2021-08-02 14:34:00	2021-08-03 04:43:00	>18 yrs	Male	ALL	Yes	No	No	<5 Days	?	<0.5	?	None	?	Skin and soft tissue				Infective												Expired	Line+Peri:E.coli	Resistant	Resistant	Resistant	Resistant	Resistant	Resistant		Sensitive	Sensitive	Resistant		Resistant		Resistant	Resistant
																																	Trach: E.coli	Resistant	Resistant	Resistant	Resistant	Resistant	Resistant	Resistant	Sensitive	Sensitive	Resistant		Resistant		Sensitive	Sensitive
45	583-02-44	2021-08-15 18:43:00	2021-08-24 13:49:00	<18 yrs	Female	ALL	Yes	No	No	5-10 days	<6 months	<0.5	>7 days	Yes	>4	Resp. Tract		Infective														Improved	1.C.parapsilosis (Line+peri)
																																	2.Acinetobacter species (Peri)						Sensitive		Sensitive	Sensitive	Sensitive		Resistant		Sensitive	Sensitive	Sensitive
																																	3.Line: Streptococcus species				Sensitive
46	812-41-83	2021-08-18 17:08:00	2021-08-19 13:56:00	<18 yrs	Male	ALL	Yes	No	No	<5 Days	> 6 months	<0.5	>7 days	Yes	4	Line																Improved	Line+peri: 1Enterobacter species	Resistant	Resistant	Sensitive	Sensitive	Sensitive	Sensitive	Sensitive	Sensitive	Sensitive	Sensitive		Sensitive		Sensitive	Sensitive
																																	Line+peri: 2.Staphylococcus species								Sensitive	Sensitive		Sensitive	Sensitive
47	357-39-44	2021-09-07 02:31:00	2021-09-12 13:40:00	<18 yrs	Male	ALL	Yes	No	No	5-10 days	<6 months	<1	>7 days	Yes	>4	Unknown				Normal												Re admitted	1.C.parapsilosis
48	435-05-21	2021-09-12 10:12:00	2021-09-18 13:51:00	<18 yrs	Male	ALL	No	Yes	No	5-10 days	>6 months	<1.5	>7 days	None	>4	Resp. Tract & GI tract	Infective															Improved	P.aeruginosa						Sensitive	Sensitive	Sensitive	Sensitive	Sensitive				Sensitive	Sensitive	Sensitive
49	441-05-83	2021-09-27 09:52:00	2021-10-24 13:01:00	<18 yrs	Male	ALL	Yes	Yes	No	>10 days	>6 months	<0.5	>7 days	PICC	>4	Resp. Tract		Infective														Re admitted	E.coli	Resistant	Sensitive	Resistant	Resistant	Resistant	Intermediate	Resistant	Sensitive	Sensitive	Resistant	Resistant	Resistant		Sensitive	Sensitive
50	357-04-75	2021-09-29 13:27:00	2021-11-06 13:58:00	<18 yrs	Male	ALL	Yes	No	No	>10 days	>6 months	<0.5	>7 days	PICC	>4	Resp. Tract & GI tract		Infective			1.Human Rhinovirus											Re admitted	1. Blood E.coli	Resistant	Resistant	Resistant	Resistant	Resistant	Resistant	Resistant	Sensitive	Sensitive	Resistant	Resistant	Resistant		Resistant	Resistant	Sensitive
																					2.Parainfluenza virus 2&3												2.Trach P.aeruginosa						Sensitive		Sensitive	Sensitive	Sensitive				Sensitive	Sensitive	Sensitive
																																	3.Blood: Staphylococcus species								Sensitive	Intermediate		Resistant	Resistant
51	357-42-85	2021-10-03 00:03:00	2021-10-08 13:49:00	<18 yrs	Female	ALL	Yes	No	No	5-10 days	<6 months	<0.5	>7 days	PICC	2	Line																Improved	Line.Acinetobacter species						Sensitive		Sensitive	Sensitive	Sensitive		Sensitive		Sensitive	Sensitive
																																	Line.Rahnella aquatilis	Resistant	Sensitive	Sensitive	Sensitive	Sensitive	Sensitive	Sensitive	Sensitive	Sensitive	Sensitive		Sensitive		Sensitive	Sensitive
																																	Line:Rhizobium radiobacter									Resistant	Intermediate		Resistant		Sensitive	Sensitive
																																	Enterobacter species	Resistant	Resistant	Sensitive	Sensitive	Sensitive	Sensitive	Sensitive	Sensitive	Sensitive	Sensitive		Sensitive		Sensitive	Sensitive
																																	Staphylococcus species								Sensitive	Sensitive		Resistant	Resistant
52	357-39-44	2021-10-04 17:47:00	2021-10-17 13:57:00	<18 yrs	Male	ALL	Yes	No	No	>10 days	<6 months	<0.5	>7 days	PICC	>4	Unknown																Improved	1.Staphylococcus species								Sensitive	Sensitive		Intermediate	Resistant
53	355-79-05	2021-10-11 22:29:00	2021-10-17 13:57:00	<18 yrs	Male	ALL	No	No	No	5-10 days	>6 months	<0.5	>7 days	None	>4	Unknown																Improved	Gram negative rod (FTG)
54	442-73-44	2021-10-15 15:31:00	2021-10-21 13:59:00	<18 yrs	Female	ALL	Yes	No	No	5-10 days	>6 months	<0.5	>7 days	PICC	>4	Line colonization	Normal															Improved	Line: Staphylococcus species								Sensitive	Sensitive		Sensitive	Sensitive
55	356-05-29	2021-11-11 13:48:00	2021-12-16 15:31:00	>18 yrs	Male	ALL	Yes	Yes	No	>10 days	>6 months	<1	>7 days	PICC	3	Unknown	Normal															Improved	Staphylococcus species								Sensitive	Sensitive		Resistant	Resistant
56	448-55-93	2021-11-16 10:35:00	2021-12-11 13:56:00	<18 yrs	Male	ALL	Yes	Yes	No	>10 days	>6 months	<0.5	>7 days	PICC	>4	Resp. Tract/GI Tract			Infective													Improved	1.Staphylococcus aureus								Sensitive	Sensitive		Resistant	Resistant
																																	2.E.coli	Resistant	Intermediate		Resistant	Resistant	Sensitive		Sensitive	Sensitive		Resistant	Resistant	Sensitive	Sensitive
57	448-05-12	2021-11-19 16:28:00	2021-11-24 13:48:00	<18 yrs	Female	ALL	Yes	No	No	5-10 days	<6 months	<0.5	>7 days	PICC	2	Unknown																Improved	Staphylococcus species								Sensitive	Sensitive		Resistant	Resistant
58	355-65-27	2021-12-13 09:34:00	2021-12-25 13:52:00	<18 yrs	Female	ALL	Yes	Yes	No	>10 days	>6 months	<1	>7 days	PICC	>4	Unknown	Normal															Improved	Staphylococcus species								Sensitive	Sensitive		Resistant	Resistant
59	436-37-83	2021-12-15 03:40:00	2021-12-17 13:48:00	<18 yrs	Female	ALL	Yes	Yes	Yes	<5 Days	>6 months	<0.5	>7 days	None	>4	ENT/Resp. Tract	Infective															Improved	Ear: Staphylococcus aureus								Sensitive	Sensitive		Resistant	Resistant
60	442-82-82	2021-12-24 02:18:00	2022-01-14 09:04:00	>18 yrs	Female	ALL	Yes	Yes	No	>10 days	>6 months	<0.5	>7 days	PICC	>4	Resp. Tract/GI Tract/UTI	Infective															Expired	Urine: E.coli	Resistant	Resistant	Resistant	Resistant		Resistant		Sensitive	Sensitive	Resistant	Resistant	Resistant	Resistant	Resistant	Resistant
																																	Blood 1.E.coli
																																	2.Enterococcus species	Sensitive								Sensitive
61	557-56-91	2021-12-25 01:51:00	2022-01-30 03:37:00	<18 yrs	Female	ALL	Yes	Yes	No	>10 days	>6 months	<0.5	>7 days	PICC	2	Resp. Tract/Line	Infective	Infective														Expired	Line + Peri:E.coli	Resistant	Resistant	Resistant	Resistant	Resistant	Resistant	Resistant	Resistant	Resistant	Resistant	Resistant	Resistant		Resistant	Resistant
																																	2.Candida krusei
																																	Line+ Peri: Klebsiella pneumoniae	Resistant	Sensitive		Resistant	Resistant	Sensitive		Sensitive	Sensitive		Sensitive	Resistant	Sensitive	Sensitive	Sensitive
62	206-26-69	2022-01-02 06:11:00	2022-01-19 17:31:00	<18 yrs	Female	ALL	Yes	Yes	No	>10 days	>6 months	<0.5	>7 days	PICC	2	Musculoskeletal			Infective													Improved	Line: Staphylococcus species								Resistant	Resistant		Resistant	Resistant
63	357-04-75	2022-01-24 03:23:00	2022-01-30 17:56:00	<18 yrs	Male	ALL	Yes	No	No	5-10 days	>6 months	<0.5	>7 days	PICC	>4	GI Tract	Normal															Expired	Staphylococcus species								Sensitive	Intermediate		Resistant	Sensitive
64	355-65-27	2022-03-09 23:05:00	2022-03-16 22:42:00	<18 yrs	Female	ALL	Yes	yes	No	5-10 days	>6 months	<0.5	>7 days	PICC	>4	GI Tract																Improved	Staphylococcus species								Resistant	Sensitive		Resistant	Resistant
65	448-33-54	2022-03-18 18:50:00	2022-03-21 13:56:00	<18 yrs	Male	ALL	Yes	No	No	<5 Days	<6 months	<0.5	>7 days	PICC	>4	GI tract																Improved	1.P.aeruginosa						Resistant		Sensitive	Sensitive	Sensitive				Sensitive	Sensitive	Sensitive
																																	2.E.coli	Resistant	Resistant	Resistant	Resistant	Resistant	Resistant	Resistant	Sensitive	Resistant	Resistant		Resistant		Resistant	Resistant
66	357-39-44	2022-03-31 10:17:00	2022-04-02 13:17:00	<18 yrs	Male	ALL	Yes	No	No	<5 Days	>6 months	<0.5	>7 days	PICC	>4	Unknown																Re-admitted	Pus swab: Staphylococcus species									Sensitive		Resistant	Resistant
67	445-05-39	2022-04-14 09:06:00	2022-04-25 14:59:00	>18 yrs	Female	ALL	Yes	No	No	>10 days	>6 months	<0.5	>7 days	None	>4	GI Tract/ENT/Resp. Tract		Infective	Infective													Improved	Streptococcus mitis	Resistant			Resistant
68	452-90-45	2022-04-22 14:05:00	2022-05-28 17:56:00	<18 yrs	Male	ALL	Yes	Yes	No	>10 days	>6 months	<0.5	>7 days	PICC	1	GI Tract/Musculoskeletal		Infective	Infective	Infective												Improved	Stool. Salmonella species	Resistant		Resistant	Resistant						Intermediate		Resistant		Sensitive
69	453-16-59	2022-04-20 16:18:00	2022-04-25 18:08:00	<18 yrs	Male	ALL	Yes	No	No	<5 Days	<6 months	<0.5	>7 days	Unknown	1	GI Tract				Normal												Improved	Stool. Salmonella group B	Resistant		Sensitive	Sensitive						Intermediate		Sensitive
70	149-26-60	2022-04-26 04:10:00	2022-04-28 17:39:00	>18 yrs	Female	ALL	Yes	No	No	<5 Days	>6 months	<0.5	>7 days	PICC	>4	GI Tract																Re-admitted	Urine: E.coli	Resistant	Sensitive	Resistant	Resistant		Sensitive		Sensitive	Resistant	Resistant		Resistant	Sensitive
																																	Blood. Enterobacter cloacae	Resistant	Resistant		Sensitive	Resistant	Sensitive		Sensitive	Sensitive		Sensitive	Resistant	Sensitive	Sensitive
71	400-66-58	2022-05-06 10:20:00	2022-05-07 13:56:00	<18 yrs	Male	ALL	Yes	Yes	Yes	<5 Days	>6 months	<0.5	>7 days	Unknown	>4	Unknown																Improved	Samonella species	Sensitive		Sensitive	Sensitive						Sensitive		Sensitive
72	446-29-17	2022-05-09 20:29:00	2022-05-16 13:48:00	>18 yrs	Male	ALL	Yes	No	No	5-10 days	>6 months	<0.5	>7 days	CVP	>4	Resp. Tract	Infective															Re-admitted	Trach+Blood: P.aeruginosa						Sensitive	Resistant	Sensitive	Sensitive	Intermediate				Resistant	Resistant	Sensitive
74	429-79-40	2020-01-08 08:14:00	2020-01-22 13:58:00	>18 yrs	Female	AML	Yes	Yes	No	>10 days	>6 months	<0.5	>7 days	CVP	2	UTI																Improved	Urine: Klebsiella pneumoniae	Resistant	Resistant	Resistant	Resistant	Resistant	Resistant	Resistant	Sensitive	Resistant	Resistant		Resistant		Resistant	Resistant
75	355-36-51	2020-01-31 22:50:00	2020-03-06 21:01:00	>18 yrs	Male	AML	Yes	No	No	>10 days	<6 months	<0.5	>7 days	No	None	ENT/Resp. Tract	Infective	Infective			Negative											Improved	Sinus tissue: A.flavus + Fusarium
76	426-61-67	2020-02-02 11:59:00	2020-02-13 13:50:00	>18 yrs	Female	AML	Yes	No	No	>10 days	>6 months	<0.5	>7 days	PICC	>4	Unknown	Normal															Improved	Leuconostoc
77	355-35-41	2020-02-12 15:06:00	2020-03-16 13:57:00	>18 yrs	Male	AML	Yes	No	No	>10 days	<6 months	<0.5	>7 days	PICC&CVC	1	Resp. Tract	Normal					H1N1										Improved	Line+Peri:E.coli	Resistant	Resistant	Resistant	Resistant	Resistant	Intermediate	Resistant	Sensitive	Intermediate	Resistant		Resistant		Sensitive	Sensitive
																																	Streptococcus species	Resistant			Resistant
78	057-27-99	2020-02-21 17:30:00	2020-03-15 03:56:00	>18 yrs	Female	AML	Yes	Yes	No	>10 days	>6 months	<0.5	>7 days	PICC	>4	Unknown	Normal		Normal	Normal												Expired	1.Stenotrophomonas maltophilia											Sensitive	Sensitive
																																	2.Ecoli	Resistant	Intermediate	Resistant	Sensitive	Resistant	Sensitive	Sensitive	Sensitive	Sensitive	Resistant		Sensitive		Sensitive	Sensitive
79	423-06-49	2020-02-27 10:12:00	2020-04-06 13:55:00	<18 yrs	Male	AML	Yes	Yes	Yes	>10 days	>6 months	<0.5	>7 days	PICC	>4	Unknown	Normal	Normal														Re-admitted	Neisseria species				Sensitive
80	408-50-21	2020-03-11 01:19:00	2020-03-19 13:18:00	<18 yrs	Male	AML	Yes	No	No	5-10 days	<6 months	<0.5	>7 days	PICC	>4	Unknown																Re-admitted	Staphylococcus species								Sensitive	Sensitive		Sensitive	Sensitive
81	430-32-34	2020-03-11 23:22:00	2020-03-29 16:28:00	<18 yrs	Male	AML	Yes	No	No	>10 days	<6 months	<0.5	>7 days	PICC	>4	Resp. Tract/Urinary Tract		Infective														Improved	C.auris
82	355-62-38	2020-03-24 13:39:00	2020-04-16 13:46:00	>18 yrs	Male	AML	Yes	No	No	>10 days	<6 months	<0.5	>7 days	PICC	1	GI Tract	Normal															Improved	Pus.MRSA									Resistant		Resistant	Resistant
																																	Line. Aeromonas hydrophilia				Sensitive	Sensitive	Sensitive	Sensitive	Sensitive	Sensitive	Sensitive		Sensitive		Sensitive	Sensitive
83	355-35-41	2020-04-19 12:05:00	2020-04-25 13:53:00	>18 yrs	Male	AML	Yes	No	No	5-10 days	<6 months	<0.5	>7 days	None	3	Unknown	Normal															Improved	E.coli	Resistant	Resistant	Resistant	Resistant	Resistant	Resistant	Resistant	Sensitive	Sensitive	Resistant		Resistant		Sensitive	Sensitive
84	355-36-51	2020-05-19 05:52:00	2020-05-26 07:08:00	>18 yrs	Male	AML	Yes	No	No	5-10 days	<6 months	<0.5	>7 days	CVC	3	Resp. Tract	Infective															Expired	Trach. 1. P.aeruginosa						Sensitive	Resistant	Sensitive	Sensitive	Sensitive				Resistant	Resistant
																																	Trach 2.MRSA									Resistant		Resistant	Resistant
																																	Blood: Beta hemolytic streptococcus group A				Sensitive
85	355-35-41	2020-05-24 18:10:00	2020-05-28 16:07:00	>18 yrs	Male	AML	Yes	No	No	5-10 days	<6 months	<0.5	>7 days	PICC	>4	Unknown	Normal			Normal												Expired	Candida Glabrata
86	434-98-80	2020-06-11 12:08:00	2020-07-02 16:08:00	>18 yrs	Male	AML	Yes	No	No	>10 days	<6 months	<0.5	>7 days	PICC	None	Unknown	Normal															Improved	Line: STAPHYLOCOCCUS SPECIES								Sensitive	Sensitive			Sensitive
87	517-03-13	2020-07-13 09:38:00	2020-08-14 13:40:00	<18 yrs	Female	AML	Yes	No	No	>10 days	<6 months	<0.5	>7 days	PICC	1	Resp. Tract		Infective			Negative											Improved	KLEBSIELLA PNEUMONIAE	Resistant	Sensitive	Sensitive	Sensitive	Sensitive	Sensitive		Sensitive	Sensitive	Sensitive		Sensitive		Sensitive	Sensitive
88	251-87-99	2020-08-07 15:54:00	2020-08-31 13:17:00	>18 yrs	Female	AML	Yes	No	No	>10 days	Unknown	<0.5	>7 days	PICC	1	Resp. Tract		Infective			Pneumocystis J											Improved	ACINETOBACTER BAUMANNII						Sensitive		Sensitive	Sensitive	Sensitive		Sensitive		Sensitive	Sensitive	Sensitive
																																	STAPHYLOCOCCUS SPECIES (NOT AUREUS)								Sensitive	Sensitive			Sensitive
89	356-03-76	2020-08-15 11:36:00	2020-09-11 11:54:00	>18 yrs	Female	AML	Yes	No	No	>10 days	<6 months	<0.5	>7 days	PICC	Unknown	Resp. Tract/ENT		Infective			Rhinoviruses and enteroviruses											Expired	ESCHERICHIA COLI	Resistant	Resistant	Resistant	Resistant	Resistant	Resistant	Resistant	Sensitive	Resistant	Resistant		Resistant		Resistant	Resistant
																																	Nasal: ASPERGILLUS FLAVUS, Mucoraceous mold
90	517-03-13	2020-09-02 13:09:00	2020-09-14 12:39:00	<18 yrs	Female	AML	Yes	No	No	>10 days	<6 months	<0.5	>7 days	PICC	3	Unknown																Improved	STREPTOCOCCUS SPECIES				Sensitive
91	206-96-71	2020-09-03 16:44:00	2020-10-05 19:11:00	>18 yrs	Male	AML	Yes	Yes	No	>10 days	>6 months	<0.5	>7 days	PICC	None	Line/Resp. Tract	Infective	Infective														Improved	PSEUDOMONAS SPECIES												Sensitive			Resistant
92	435-32-22	2020-09-08 20:14:00	2020-09-14 21:09:00	<18 yrs	Male	AML	Yes	No	No	5-10 days	<6 months	<0.5	>7 days	PICC	2	Line																Improved	STAPHYLOCOCCUS SPECIES (NOT AUREUS)								Resistant	Resistant			Resistant
93	355-97-47	2020-09-09 09:34:00	2020-09-19 13:55:00	>18 yrs	Female	AML	Yes	No	No	>10 days	<6 months	<0.5	>7 days	None	2	Resp. Tract	Infective															Improved	ACINETOBACTER SPECIES						Resistant		Resistant	Resistant	Resistant		Intermediate		Resistant	Resistant
94	436-94-02	2020-09-09 20:48:00	2020-10-04 13:58:00	<18 yrs	Female	AML	Yes	No	No	>10 days	<6 months	<0.5	>7 days	PICC	None	Line	Normal															Improved	STAPHYLOCOCCUS SPECIES (NOT AUREUS)								Sensitive	Sensitive			Sensitive
95	355-78-28	2020-09-16 17:03:00	2020-10-24 08:48:00	<18 yrs	Female	AML	Yes	No	No	>10 days	>6 months	<0.5	>7 days	PICC	>4	GI Tract	Infective															Expired	PSEUDOMONAS STUTZERI (UTC) IGNORE						Resistant		Resistant	Sensitive			Resistant		Resistant	Resistant
																																	ACINETOBACTER SPECIES						Sensitive		Sensitive	Sensitive	Sensitive		Sensitive		Sensitive	Sensitive
																																	ENTEROCOCCUS SPECIES	Sensitive								Sensitive
																																	Aspergillus niger (Necrotic bone)
96	298-97-89	2020-09-28 16:21:00	2020-10-19 09:52:00	>18 yrs	Female	AML	Yes	Yes	No	>10 days	>6 months	<0.5	>7 days	PICC	None	Infective endocarditis/Resp. tract/GI Tract	Infective			Aortic Vegetation												Expired	Blood: ENTEROCOCCUS SPECIES	Resistant								Resistant
																																	PICTL:STAPHYLOCOCCUS SPECIES (NOT AUREUS)									Sensitive			Sensitive
																																	Line:CANDIDA ALBICANS
																																	Blood: STAPHYLOCOCCUS SPECIES (NOT AUREUS)								Sensitive	Sensitive			Resistant
97	437-02-57	2020-09-27 10:40:00	2020-10-14 14:56:00	>18 yrs	Female	AML	Yes	No	No	>10 days	<6 months	<0.5	>7 days	PICC	2	Resp. Tract	Infective															Unknown	Sputum: Aspergillus niger and flavus
98	812-11-67	2020-10-18 00:01:00	2020-10-26 16:15:00	>18 yrs	Female	AML	Yes	No	No	5-10 days	<6 months	<0.5	>7 days	PICC	3	UTI	Infective															Improved	Urine: E.coli	Resistant	Sensitive	Sensitive	Sensitive		Sensitive		Sensitive	Sensitive	Resistant		Sensitive
99	074-87-45	2020-10-26 12:06:00	2020-11-20 20:18:00	>18 yrs	Male	AML	Yes	No	No	>10 days	>6 months	<0.5	>7 days	PICC	2	Resp. Tract/Line	Infective															Expired	Line+Peri+Urine: ENTEROCOCCUS SPECIES	Resistant								Resistant
																																	Blood+Trach: STENOTROPHOMONAS MALTOPHILIA											Sensitive	Sensitive
																																	Blood: STAPHYLOCOCCUS SPECIES (NOT AUREUS)								Resistant	Resistant			Resistant
																																	Tracheal: PSEUDOMONAS AERUGINOSA						Sensitive	Sensitive	Sensitive	Sensitive					Sensitive	Sensitive	Sensitive
100	436-94-02	2020-10-30 10:52:00	2020-11-09 13:42:00	<18 yrs	Female	AML	Yes	No	No	>10 days	<6 months	<0.5	>7 days	PICC	2	Unknown																Re-admitted	Blood: STAPHYLOCOCCUS SPECIES (NOT AUREUS)								Sensitive	Resistant			Resistant
101	582-00-55	2020-11-05 11:21:00	2020-12-02 13:56:00	<18 yrs	Male	AML	Yes	No	No	>10 days	<6 months	<0.5	>7 days	PICC	2	Unknown																Improved	Blood:STAPHYLOCOCCUS SPECIES (NOT AUREUS)								Sensitive	Sensitive			Resistant
																																	Blood: STREPTOCOCCUS SPECIES	Sensitive			Sensitive				Intermediate
102	190-13-86	2020-11-05 18:14:00	2020-11-21 15:53:00	>18 yrs	Female	AML	Yes	No	No	>10 days	>6 months	<0.5	>7 days	None	>4	Resp. Tract	Infective				COVID PCR+											Improved	Urine: ESCHERICHIA COLI	Resistant	Sensitive	Resistant	Resistant		Sensitive		Sensitive	Sensitive	Resistant		Resistant	Sensitive
103	206-96-71	2020-11-19 11:18:00	2021-01-01 15:04:00	>18 yrs	Male	AML	Yes	Yes	Yes	>10 days	>6 months	<0.5	>7 days	PICC	1	GI tract/Resp. Tract	Infective	Infective														Re-admitted	Tracheal: STENOTROPHOMONAS MALTOPHILIA												Sensitive
																																	Tracheal: STAPHYLOCOCCUS AUREUS								Resistant	Resistant			Sensitive
																																	Latent TB: IGRA +
104	435-94-02	2020-11-23 00:57:00	2020-12-04 13:43:00	<18 yrs	Male	AML	Yes	No	No	>10 days	<6 months	<0.5	>7 days		>4	Unknown																Improved	Blood: STREPTOCOCCUS SPECIES	Resistant			Sensitive
105	807-11-24	2020-11-26 12:02:00	2020-12-12 16:18:00	>18 yrs	Female	AML	Yes	No	No	>10 days	<6 months	<0.5	>7 days	PICC	None	Resp. Tract/Line	Infective				COVID PCR+											Expired	Tracheal+Blood(Line+Peri): ENTEROCOCCUS FAECIUM	Resistant
106	439-18-17	2020-12-26 10:23:00	2021-01-11 13:15:00	>18 yrs	Male	AML	Yes	No	No	>10 days	<6 months	<0.5	>7 days	PICC	1	Line																Improved	Line+Peri: ESCHERICHIA COLI	Resistant	Intermediate	Resistant	Resistant	Resistant	Intermediate	Resistant	Sensitive	Sensitive	Resistant		Resistant	Sensitive	Sensitive	Sensitive
																																	Line+Peri: STAPHYLOCOCCUS SPECIES								Sensitive	Sensitive			Resistant
107	190-13-86	2020-12-31 20:33:00	2021-01-07 14:22:00	>18 yrs	Female	AML	Yes	No	No	5-10 days	>6 months	<0.5	>7 days	None	>4	UTI	Normal															Improved	Urine+Blood: ESCHERICHIA COLI	Resistant	Sensitive	Resistant	Resistant		Sensitive		Sensitive	Sensitive	Resistant		Resistant	Sensitive
108	423-06-33	2021-01-02 12:43:00	2021-01-18 05:43:00	>18 yrs	Male	AML	Yes	Yes	No	>10 days	>6 months	<0.5	>7 days	None	3	Resp. Tract	Infective	Infective														Expired	Sputum: Aspergillus flavus
																																	CORYNEBACTERIUM SPECIES (UTC)										Sensitive
109	812-11-67	2021-01-17 15:02:00	2021-01-21 13:58:00	>18 yrs	Female	AML	Yes	No	No	5-10 days	> 6 months	<0.5	> 7 days	None	>4	Resp. Tract/Skin and soft tissue	Infective			Infective												Readmitted	Blood: E.coli	Resistant	Resistant	Resistant	Resistant	Resistant	Resistant	Resistant	Sensitive	Sensitive	Resistant		Sensitive		Resistant	Resistant
110	582-00-55	2021-01-21 12:12:00	2021-02-14 14:42:00	<18 yrs	Male	AML	Yes	No	No	>10 days	<6 months	<0.5	> 7 days	PICC	>4	Lines																Readmited	Line+Peri: Staph species								Sensitive	Sensitive		Sensitive	Resistant
111	441-48-58	2021-02-09 10:50:00	2021-03-30 19:01:00	<18 yrs	Female	AML	Yes	No	No	>10 days	<6 months	<0.5	> 7 days	PICC	None	GI tract	Infective	Infective														Readmitted	Blood: E.coli	Resistant	Resistant	Resistant	Resistant	Resistant	Resistant	Resistant	Sensitive	Sensitive	Resistant		Resistant		Resistant	Resistant
112	557-91-85	2021-02-09 04:52:00	2021-02-24 19:03:00	<18 yrs	Female	AML	Yes	No	No	>10 days	> 6 months	<0.5	> 7 days	CVP	None	Resp. Tract	Infective	Infective			Rhinovirus											Improved	None
113	418-30-23	2021-02-12 15:03:00	2021-02-14 13:57:00	<18 yrs	Male	AML	Yes	Yes	Yes	<5 days	> 6 months	<0.5	> 7 days	None	>4	Unknown																Readmitted	Blood: STAPHYLOCOCCUS SPECIES (NOT AUREUS)								Sensitive	Sensitive		Resistant	Resistant
114	439-18-17	2021-02-13 14:47:00	2021-02-16 13:51:00	>18 yrs	Male	AML	Yes	No	No	<5 days	<6 months	<0.5	> 7 days	PICC	3	Lines	Infective															Improved	Line+Peri: Staph species								Sensitive	Sensitive		Resistant	Sensitive
115	441-90-77	2021-02-18 15:24:00	2021-03-11 13:50:00	>18 yrs	Female	AML	Yes	No	No	>10 days	<6 months	<0.5	> 7 days	PICC	None	Resp. Trct	Infective															Readmitted	Sputum: Stenotrophomonas maltophilia											Sensitive	Sensitive
116	440-68-56	2021-02-22 17:08:00	2021-03-24 15:56:00	>18 yrs	Male	AML	Yes	No	No	>10 days	<6 months	<0.5	> 7 days	PICC	2	Lines																Improved	Line: Staph species								Sensitive	Sensitive		Resistant	Resistant
																																	2.Line+peri: E.coli	Resistant	Resistant	Resistant	Resistant	Resistant	Resistant	Resistant	Sensitive	Sensitive	Resistant		Resistant		Resistant	Resistant
117	418-30-23	2021-02-24 17:26:00	2021-03-03 13:55:00	<18 yrs	Male	AML	No	Yes	Yes	5-10 days	>6 months	<0.5	> 7days	None	>4	Unknown																Re-admitted	Blood: E.coli	Resistant	Resistant	Resistant	Resistant	Resistant	Intermediate	Resistant	Sensitive	Sensitive	Resistant		Sensitive		Sensitive	Sensitive
118	582-00-55	2021-02-28 07:25:00	2021-03-06 13:51:00	<18 yrs	Male	AML	Yes	No	No	5-10 days	<6 months	<1	> 7days	PICC	>4	Lines	Normal															Re-admitted	Line+peri: Staph species								Sensitive	Sensitive		Sensitive	Resistant
																																	Peri: Staph aureus								Sensitive	Sensitive		Resistant	Sensitive
120	356-90-24	2021-03-26 20:04:00	2021-04-23 13:40:00	>18 yrs	Male	AML	Yes	No	No	>10 days	<6 months	<0.5	> 7 days	PICC	None	GI tract/Resp. Tract	Infective	Infective		Infective												Improved	Line: Corynae species (UTC) Ignore										Resistant
																																	Peri: Staph species								Sensitive	Sensitive		Sensitive	Sensitive
121	356-73-82	2021-03-30 09:40:00	2021-04-27 14:00:00	>18 yrs	Male	AML	Yes	No	No	>10 days	<6 months	<0.5	> 7 days	PICC	2	Resp. Tract/Skin and soft tissue	Infective															Improved	Blood: E.coli	Resistant	Resistant	Resistant	Resistant	Resistant	Resistant	Resistant	Sensitive	Sensitive	Resistant		Resistant		Resistant	Resistant
122	441-05-75	2021-03-29 22:46:00	2021-04-23 21:16:00	<18 yrs	Female	AML	Yes	No	No	>10 days	<6 months	<0.5	> 7 days	PICC	2	Unknown		Normal														Improved	Blood: Pseudomonas species								Sensitive	Sensitive	Sensitive		Sensitive		Sensitive	Sensitive
123	418-30-23	2021-03-30 10:38:00	2021-04-13 15:26:00	<18 yrs	Male	AML	No	Yes	Yes	>10 days	>6 months	<0.5	> 7 days	None	>4	Resp. Tract	Infective															Unknown	Blood: Staph species								Sensitive	Sensitive		Sensitive	Sensitive
124	414-86-03	2021-03-31 11:01:00	2021-04-23 19:43:00	<18 yrs	Male	AML	Yes	Yes	No	>10 days	>6 months	<0.5	> 7 days	PICC	>4	Unknown	Normal															Improved	Line: Staph species 2x								Sensitive	Sensitive		Sensitive	Resistant
																																	Peri: Klebsiella pneumoniae	Resistant	Sensitive	Sensitive	Sensitive	Sensitive	Sensitive	Sensitive	Sensitive	Sensitive	Sensitive		Sensitive		Sensitive	Sensitive
125	441-48-58	2021-04-03 14:56:00	2021-04-16 13:57:00	<18 yrs	Female	AML	Yes	No	No	>10 days	<6 months	<0.5	> 7 days	CVC	2	Unknown	Normal															Re-admitted	Blood: Staph species								Sensitive	Sensitive		Resistant	Resistant
126	442-60-25	2021-04-17 09:03:00	2021-04-20 13:57:00	>18 yrs	Female	AML	Yes	No	No	< 5 days	<6 months	<0.5	> 7 days	None	3	UTI/GI tract	Infective															Improved	Blood: E.coli	Resistant	Resistant		Resistant	Resistant	Sensitive	Intermediate	Sensitive	Resistant	Resistant		Resistant		Sensitive	Sensitive
																																	Urine: Klebsiella pneumoniae	Resistant	Resistant	Resistant	Resistant		Resistant		Resistant	Resistant	Resistant		Resistant	Resistant	Resistant	Resistant
127	441-48-58	2021-04-23 16:44:00	2021-06-10 10:30:00	<18 yrs	Female	AML	Yes	No	No	>10 days	<6 months	<0.5	> 7 days	PICC	2	Resp. Tract/UTI/Musculoskeletal	Infective	Infective		Infective												Expired	Blood: Enterococcus species	Resistant								Resistant
																																	Blood: Staphylococcus species								Sensitive	Sensitive		Sensitive	Resistant
																																	Blood: E.coli	Resistant	Resistant	Resistant	Resistant	Resistant	Resistant	Resistant	Resistant	Resistant	Resistant		Resistant		Resistant	Resistant
																																	Blood: Candida albicans
128	443-75-56	2021-04-30 08:22:00	2021-05-18 07:47:00	>18 yrs	Female	AML	Yes	No	No	>10 days	<6 months	<0.5	> 7 days	PICC	None	GI tract	Infective	Infective		Infective												Expired	PICC LINE TIP: Staphylococcus species									Sensitive		Sensitive	Sensitive
																																	Blood peri: Leuconostoc
																																	Blood: Klebsiella pneumoniae	Resistant	Sensitive	Sensitive	Sensitive	Sensitive	Sensitive	Sensitive	Sensitive	Sensitive	Sensitive		Sensitive		Sensitive	Sensitive
129	440-75-72	2021-04-30 17:26:00	2021-05-13 13:35:00	>18 yrs	Female	AML	Yes	No	No	>10 days	<6 months	<0.5	>7 days	PICC	>4	CLABSI	Normal	Normal														Improved	Line+Peri Blood: Staphylococcus aureus								Sensitive	Sensitive		Resistant	Resistant
130	443-81-69	2021-05-11 08:52:00	2021-05-14 15:27:00	>18 yrs	Male	AML	Yes	No	No	<5 days	<6 months	<0.5	>7 days	Yes	2	Resp. Tract	Infective	Infective			COVID											Unknown	Tracheal: Mucor
131	189-74-57	2021-05-19 22:04:00	2021-05-25 13:42:00	>18 yrs	Male	AML	Yes	No	No	5-10 days	<6 months	<0.5	>7 days	Yes	>4		Normal															Improved	Line cultures: Staphylococcus species								Sensitive	Sensitive		Resistant	Resistant
132	357-25-62	2021-06-23 12:45:00	2021-07-19 14:45:00	>18 yrs	Male	AML	Yes	No	No	>10 days	<6 months	<0.5	>7 days	Yes	None	Resp. Tract	Infective	Infective														Improved	Sputum: Staphylococcus aureus									Sensitive		Resistant	Sensitive
																																	Sputum: Flavobacterium species						Resistant		Resistant	Resistant	Sensitive	Sensitive	Sensitive		Resistant	Resistant
133	444-95-27	2021-07-08 12:28:00	2021-07-18 14:06:00	>18 yrs	Male	AML	Yes	No	No	>10 days	<6 months	<0.5	>7 days	Yes	None	Resp. Tract	Infective															Expired	Tracheal: 1. Stenotrophomonas maltophilia											Sensitive	Sensitive
																																	2. Acinetobacter species								Resistant	Resistant	Resistant		Resistant		Resistant	Resistant
																																	3. Klebsiella pneumoniae	Resistant	Sensitive	Resistant	Resistant	Resistant	Sensitive	Intermediate	Sensitive	Sensitive	Sensitive		Resistant		Sensitive	Sensitive
134	440-68-56	2021-07-08 14:24:00	2021-07-15 13:51:00	>18 yrs	Male	AML	Yes	Yes	No	5-10 days	>6 months	<0.5	>7 days	Yes	>4	Line?	Normal															Improved	PICC LINE TIP: Staphylococcus species											Resistant	Resistant
																																	Peri+Line: Staphylococus species								Sensitive	Sensitive		Resistant	Resistant
																																	Line: Streptococcus species	Sensitive			Sensitive
135	443-34-17	2021-07-12 02:39:00	2021-07-17 15:36:00	>18 yrs	Male	AML	Yes	No	No	5-10 days	<6 months	<0.5	>7 days	Yes	>4	GI tract				Infective												Improved	Pus tissue: A.flavus
																																	Perianal abscess: 1. E.coli	Resistant	Resistant	Resistant	Sensitive	Resistant	Sensitive	Sensitive	Sensitive	Sensitive	Resistant		Resistant		Sensitive	Sensitive
																																	2. Streptococcus group D				Sensitive
																																	Blood: E.coli	Resistant	Resistant	Resistant	Sensitive	Resistant	Sensitive	Sensitive	Sensitive	Sensitive	Resistant		Resistant		Sensitive	Sensitive
136	443-75-67	2021-07-16 11:03:00	2021-08-10 16:31:00	<18 yrs	Male	AML	Yes	No	No	>10 days	<6 months	<0.5	> 7 days	Yes	>4	Resp. Tract	Infective	Infective														Improved	Blood: Candida tropicalis
																																	Stool: Vibrio cholerae (Inaba)	Sensitive									Sensitive		Sensitive
137	440-68-56	2021-07-31 14:02:00	2021-09-10 18:47:00	>18 yrs	Male	AML	Yes	Yes	Yes	>10 days	>6 months	<0.5	>7 days	Yes	>4	GI tract		Infective														Improved	Blood: E.coli	Resistant	Resistant	Resistant	Resistant	Resistant	Resistant	Resistant	Sensitive	Sensitive	Resistant		Resistant		Resistant	Resistant
138	564-54-97	2021-08-23 13:49:00	2021-09-02 12:42:00	<18 yrs	Female	AML	Yes	No	No	>10 days	<6 months	<0.5	>7 days	Yes	3	ENT/Resp. Tract	Infective	Infective														Readmitted	Blood: Staphylococcus species (Not Aureus)								Sensitive	Sensitive		resistant	Resistant
139	441-05-75	2021-08-26 00:36:00	2021-09-11 13:50:00	<18 yrs	Female	AML	Yes	No	No	>10 days	>6 months	<0.5	>7 days	Yes	>4	Resp. Tract	Normal	Infective														Readmitted	Blood: Enterococcus species	Resistant								resistant
																																	Blood: Streptococcus species	Sensitive			Sensitive
140	443-75-67	2021-08-27 10:49:00	2021-09-22 12:55:00	<18 yrs	male	AML	Yes	No	No	>10 days	>6 months	<0.5	>7 days	Yes	>4	Resp. Tract	Infective	Infective														Readmitted	Blood: Streptococcus species	Sensitive			Sensitive
																																	Tracheal: A.flavus
																																	Blood. Staphylococcus species								Resistant	Resistant		Resistant	Sensitive
141	357-44-88	2021-10-09 15:08:00	2021-10-23 13:52:00	<18 yrs	Male	AML	Yes	No	No	>10 days	>6 months	<0.5	>7 days	Yes	3	Resp. Tract	Infective	infective														Improved	Line+peri: Candida parapsilosis (2x)
																																	Line: STAPHYLOCOCCUS SPECIES									Sensitive		Resistant	Resistant
142	357-25-62	2021-10-13 14:41:00	2021-11-11 14:09:00	>18 yrs	Female	AML	yes	No	No	>10 days	>6 months	<0.5	>7 days	Yes	>4	Dengue	Normal															Readmitted	Line: Staphylococcus species( not aureus)								sensitive	sensitive		resistant	resistant
143	356-82-31	2021-11-12 11:33:00	2021-12-06 13:58:00	>18 yrs	Male	AML	Yes	Yes	No	>10 days	<6 months	<0.5	>7 days	Yes	2	Unknown	Normal															Readmitted	Line+Peri: E. coli	Resistant	Resistant	resistant	resistant	resistant	resistant	resistant	sensitve	resistant	resistant	resistant	resistant		resistant	resistant
144	439-18-17	2021-11-13 17:47:00	2021-11-18 14:01:00	>18 yrs	Male	AML	Yes	No	No	5-10 days	>6 months	<0.5	>7 days	No	>4	Unknown	Normal															Re admitted	Blood: E. coli	Resistant	Sensitive	Resistant	Resistant	Resistant		sensitive	sensitive	sensitive	Resistant		resistant		sensitive	sensitive
145	357-25-69	2021-11-28 10:18:00	2021-12-01 15:51:00	>18 yrs	Female	AML	yes	No	No	<5 days	>6 months	<0.5	>7 days	Yes	>4	Unknown	Normal															Improved	Blood: E. Coli	Resistant	Sensitive	Resistant	Resistant	Resistant		Intermediate	sensitive	resistant	Resistant		resistant		sensitive	sensitive
146	357-44-88	2021-12-06 13:56:00	2021-12-21 13:57:00	<18 yrs	Male	AML	Yes	No	No	>10 days	>6 months	<0.5	>7 days	Yes	4	Unknown																Improved	Line: E.coli	Resistant	Resistant		Resistant		Resistant		Sensitive	Sensitive		Resistant	Resistant		sensitive	Intermediate
																																	Line: Staphylococcus species								Resistant	Sensitive		Resistant	Resistant
																																	Line: Enterococcus species	Resistant								Sensitive
																																	Blood: Acinetobacter species						Sensitive		Sensitive	Sensitive	Sensitive		Sensitive		Sensitive	Sensitive
147	357-25-62	2021-12-12 13:44:00	2021-12-24 15:11:00	>18 yrs	Male	AML	Yes	No	No	>10 days	>6 months	<0.5	>7 days	No	>4	Unknown	Normal															Improved	Blood; E.coli	Resistant	Resistant	Resistant	Intermediate	Intermediate	Sensitive	Intermediate	Sensitive	Sensitive	Resistant	Resistant	Resistant	Sensitive	Sensitive
148	247-02-96	2022-02-07 20:18:00	2022-02-26 20:22:00	>18 yrs	Male	AML	Yes	No	No	>10 days	>6 months	<0.5	>7 days	Yes	>4	Resp. Tract/Dengue	Infective															Improved	Line: Staphylococcus species (Not Aureus)								sensitive	sensitive		Resistant	Sensitive
149	801-85-22	2022-01-20 09:55:00	2022-02-01 22:27:00	>18 yrs	Male	AML	Yes	No	No	>10 days	>6 months	<0.5	>7 days	No	None	Resp. Tract	Infective															Unknown	Blood: Pseudomonas aeruginosa						Sensitive		sensitive	sensitive	sensitive				sensitive	sensitive
150	273-02-28	2022-01-21 12:20:00	2022-02-05 13:56:00	<18 yrs	Female	AML	yes	No	No	>10 days	>6 months	<0.5	>7 days	No	None	Resp. Tract	Infective	Infective			SARS-COV2+											Improved	Line: Corynebacterium Species										Resistant
151	358-12-19	2022-01-29 00:24:00	2022-02-12 10:33:00	>18 yrs	Female	AML	Yes	No	No	>10 days	<6 months	<0.5	>7 days	No	1	Resp. Tract	Infective	Infective														Expired	Blood: Klebsiella pneumoniae	1. Resistant	1. Resistant	1. Resistant	1. Resistant	1. Resistant	1. Resistant	1. Resistant	Resistant	Resistant	1. Resistant		Resistant		1. Resistant	1. Resistant
																																	Blood: Staph aureus								Sensitive	Sensitive		Sensitive	Sensitive
152	446-56-45	2022-02-14 21:32:00	2022-03-12 17:51:00	>18 yrs	Male	AML	Yes	No	No	>10 days	>6 months	<0.5	>7 days	Yes	>4	Line																Improved	Jocath tip: Staphylococcus species									Sensitive		Resistant	Resistant
153	358-23-38	2022-02-24 09:35:00	2022-03-28 05:48:00	>18 yrs	Female	AML	Yes	No	No	>10 days	<6 months	<0.5	>7 days	No	1	Resp. Tract	Infective	Infective														Expired	Trach: Pseudomonas aeruginosa						Sensitive		Sensitive	Sensitive	Sensitive				Sensitive	Sensitive	Sensitive
																																	Trach: MTB
																																	Trach: Acinetobacter species						Resistant		Resistant	Resistant	Resistant		Resistant		Resistant	Resistant	Resistant
154	273-02-28	2022-03-02 19:53:00	2022-04-06 13:49:00	<18 yrs	Female	AML	yes	No	No	>10 days	>6 months	<0.5	>7 days	Yes	4	Resp. Tract	Infective	Infective			PCP+											Improved	Line: Staphylococcus species									Resistant		Resistant	Sensitive
155	358-06-62	2022-01-10 19:08:00	2022-02-13 16:10:00	<18 yrs	Male	AML	No	No	No	>10 days	<6 months	<0.5	>7 days	No	1	UTI/Skin and soft tissue/GI. Tract	Infective	Infective														Improved	Blood: E. Coli	Resistant	Resistant	Resistant	Resistant	Resistant	Resistant	Resistant	Sensitive	Resistant	Resistant		Resistant		Sensitive	Sensitive
																																	Urine: P.aeruginosa						Sensitive	Resistant	Intermediate	Resistant	Intermediate				Sensitive	Sensitive
156	358-06-62	2022-04-25 12:30:00	2022-05-11 13:54:00	<18 yrs	Male	AML	No	No	No	5-10 days	>6 months	<0.5	>7 days	No	2	Resp. Tract	Infective	Infective														Improved	Blood: Staphylococcus species								Sensitive	Sensitive		Sensitive	Sensitive
157	453-43-14	2022-05-23 21:00:00	2022-06-02 15:10:00	>18 yrs	Male	AML	Yes	No	No	5-10 days	>6 months	<0.5	>7 days	No	None	Resp. Tract	Infective															Improved	Blood+Trach: Staphylococcus aureus								Resisitant	Sensitive		Resistant	Sensitive
158	247-02-96	2022-06-13 17:03:00	2022-06-15 13:57:00	>18 yrs	Male	AML	Yes	Yes	No	< 5 days	> 6 months	<0.5	>7 days	No	>4	Resp. Tract	Infective															Re-admitted	Blood: Staphylococcus species								Sensitive	Sensitive			Sensitive
161	210-30-45	2022-06-16 16:06:00	2022-07-09 15:23:00	>18 yrs	Male	AML	Yes	No	No	>10 days	<6 months	<0.5	>7 days	Yes	None	GI tract																Improved	1.Urine: Beta hemolytic streptococcus B				Sensitive
																																	2.Blood: E.coli	Resistant	Resistant	Resistant	Resistant	Resistant	Resistant	Resistant	Resistant	Resistant	Resistant	Resistant	Resistant		Resistant	Resistant	Resistant
162	357-25-69	2022-06-20 11:11:00	2022-07-15 16:07:00	>18 yrs	Female	AML	Yes	Yes	No	> 10 days	> 6 months	<0.5	>7 days	Yes	>4	Resp. Tract	Infective				COVID											Improved	Blood: E. Coli	Resistant	Resistant	Resistant	Resistant	Resistant	Resistant	Resistant	Sensitive	Sensitive	Resistant	Resistant	Resistant		Resistant	Resistant	Sensitive
163	358-94-95	2022-07-23 07:53:00	2022-08-15 07:38:00	>18 yrs	Male	AML	Yes	No	No	> 10 days	<6 months	<0.5	>7 days	Yes	None	Resp. Tract/GI tract	Infective															Expired	Blood: E. Coli	Resistant	Resistant	Resistant	Resistant	Resistant		Resistant	Sensitive		Resistant	Resistant	Resistant		Resistant	Resistant	Sensitive
																																	Trach: Pseudomonas aeruginosa								Sensitive	Sensitive	Sensitive				Sensitive	Sensitive
																																	Tissue: E.coli	Resistant	Resistant	Resistant	Resistant	Resistant	Resistant	Resistant	Sensitive	resistant	Resistant		Resistant		Resistant	Resistant
																																	Tissue: Enterococcus species	Resistant
164	358-59-45	2022-08-11 10:55:00	2022-08-25 15:18:00	>18 yrs	Female	ALL	Yes	No	No	> 10 days	<6 months	<0.5	>7 days	Yes	1	UTI	Normal															Improved	Urine: Enterococcus Species	Resistant									Resistant
165	358-32-16	2022-08-16 15:05:00	2022-09-01 16:02:00	>18 yrs	Male	ALL	Yes	No	No	> 10 days	>6 months	<0.5	>7 days	No	4	Unknown	Normal															Improved	Blood: STAPHYLOCOCCUS SPECIES (NOT AUREUS)								Sensitive	Sensitive		Resistant
166	358-84-07	2022-08-20 16:18:00	2022-09-04 16:53:00	>18 yrs	Male	AML	Yes	No	No	>10 Days	<6 months	<0.5	>7 Days	Yes	3	Unknown						Negative										Improved	PICC LINE TIP: STAPHYLOCOCCUS SPECIES (NOT AUREUS)									Sensitive		Resistant	Sensitive
167	446-56-45	2022-08-23 11:47:00	2022-09-27 18:23:00	>18 yrs	Male	AML	Yes	Yes	No	>10 Days	>6 months	<0.5	>7 Days	Yes	>4	GI tract			Infective													Improved	Blood: E.Coli	Resistant	Resistant		Resistant	Resistant	Resistant		Sensitive	Intermediate		Resistant	Resistant	Sensitive	Sensitive	Sensitive
168	358-93-33	2022-08-31 10:09:00	2022-09-15 17:54:00	>18 yrs	Female	AML	Yes	No	No	>10 Days	>6 months	<1.0	5 Days	No	2	Resp. Tract	Infective															Improved	Line+Peri: Klebsiella Species	Resistant	Resistant	Resistant	Sensitive	Resistant	Intermediate	Sensitive	Sensitive	Sensitive	Resistant		Resistant		Sensitive	Sensitive
169	592-66-30	2022-09-20 18:10:00	2022-09-30 11:17:00	>18 yrs	Female	AML	Yes	Yes	No	>10 Days	<6 months	<0.5	>7 Days	Yes	1	Unknown	Infective															Expired	Urine: Enterococci	Resistant									Resistant
170	452-79-41	2022-11-16 17:08:00	2022-11-26 16:47:00	>18 yrs	Male	AML	Yes	No	No	>10 Days	>6 months	<0.5	>7 Days	Yes	>4	Skin and soft tissue				Infective												Improved	Blood: E.Coli	resistant	Sensitive	Sensitive	Sensitive	Sensitive	Sensitive	Sensiitve	Sensitive	Resistant	Resistant	Resistant	Resistant	Sensitive	Sensitive	Sensitive
171	359-44-04	2022-11-23 05:14:00	2022-12-06 13:58:00	>18 yrs	Male	AML	Yes	No	No	>10 Days	<6 months	<0.5	>7 Days	No	2	Resp. Tract	Infective															Improved	Blood: E.Coli	Resistant	Resistant	Resisitant	Resistant	Resistant	Intermediate	Resistant	Sensitive	Resistant	Resistant		Resistant		Sensitive	Sensitive
																																	Urine: E.coli	Resistant	Intermediate	Resistant	Resistant		Sensitive		Sensitive	resistant	Resistant		Resistant	Sensitive
																																	CVP TIP: Staphylococcus species									Sensitive		Resistant	Sensitive
172	359-67-68	2023-10-04	2023-05-07	< 18 yrs	Male	AML	Yes	No	No	> 10 days	<6 months	<0.5	>7 Days	Yes	4	GI tract																Improved	Blood Line+Peri: 1.STAPHYLOCOCCUS SPECIES (NOT AUREUS)									S		R
																																	Line: Enterococcus species	S								S
173	460-49-04	2023-09-01	2023-02-10	> 18 yrs	Male	AML	Yes	No	No	>10 days	<6 months	<0.5	>7 days	Yes	None	Resp. Tract	Infective															Improved	Line: STAPHYLOCOCCUS SPECIES (NOT AUREUS								R	Resistant		R
																																	Sputum: A.flavus
174	359-83-16	2023-11-06	2023-07-14	<18 yrs	Male	AML	Yes	No	No	>10 days	<6 months	<0.5	>7 days	Yes	3	GI tract/Skin and soft tissue	Infective		Infective													Improved	Blood: PSEUDOMONAS AERUGINOSA						S				S				S	S	S
175	259-02-11	18-07-23	2023-08-18	>18 yrs	Female	AML	Yes	Yes	No	>10 days	>6 months	<0.5	>7 days	Yes	>4	CLABSI/I.E (possible)				Possible vegetation												Improved	Blood(3 set)+line: ENTEROCOCCUS SPECIES	R								R
176	259-02-11	15-10-23	2023-11-03	>18 yrs	Female	AML	Yes	Yes	Yes	>10 days	>6 months	<0.5	>7 days	Yes	>4	Resp. Tract	Infective															Expired	Blood+line: 1.Raoulltella terrigena	R	R		R	R	R		R	R		R		R	R	R	R
																																	2: ENTEROCOCCUS SPECIES	R								S
177	359-82-56	19-01-23	2023-02-13	>18 yrs	Male	AML	Yes	No	No	>10 days	<6 months	<0.5	>7 days	Yes	None	Resp. Tract/ENT	Infective				Adenovirus, Human metapnuemo & Rhinovirus											Expired	Blood (Line): STAPHYLOCOCCUS SPECIES (NOT AUREUS)								S	S		R
																																	Ear: Staphylococcus aureus								Sensitive	Sensitive		Resistant	Sensitive
178	459-54-48	29-12-2022	2023-02-05	>18 yrs	Female	AML	Yes	No	No	>10 days	<6 months	<0.5	>7 days	Yes	None	Resp. Tract/Skin and soft tissue	Infective															Improved	Blood: ENTEROCOCCUS SPECIES]avium	R								R
179	459-54-48	2023-06-03	2023-04-13	>18 yrs	Female	AML	Yes	Yes	No	>10 days	<6 months	<0.5	>7 days	Yes	1	CLABSI/Resp. Tract	Infective															Improved	Blood (Peri+line): KLEBSIELLA PNEUMONIAE	R	R	R	R	R	R	R	R	R	R	R	R		R	R
180	359-99-00	2023-05-03	2023-04-02	>18 yrs	Male	AML	Yes	No	No	>10 days	<6 months	<0.5	>7 days	Yes	None	UTI				Infective/Cystitis												Improved	Urine: ESCHERICHIA COLI	R	R	R	R		R		S	S	R	R	R	R	R	R
																																	Blood: STAPHYLOCOCCUS SPECIES (NOT AUREUS)									S		R
181	291-57-36	2023-05-30	2023-06-22	>18 yrs	Female	AML	Yes	No	Yes	>10 days	<6 months	<0.5	>7 days	Yes	3	GI tract																Readmitted	Blood (Line): ENTEROCOCCUS SPECIES	S								S
182	463-18-07	29-05-23	2023-06-23	<18 yrs	male	AML	YES	NO	NO	>10 days	>6 MONTHS	<1	>7 DAYS	NO	<4	GI tract	normal	normal	not done	normal	not done	not done										Improved	Blood: Staphylococcus species									I		R
183	463-18-07	2023-10-07	2023-08-11	<18 yrs	male	AML	yes	no	no	>10 days	> 6 months	>1	>7 DAYS	yes	<4	GI tract	normal	not available	not done	not done	not done	not done										Improved	picc line+peri: E.coli	R	R		R	R	S		S	S		R	R	R	R		S
																																	Blood Line (CVP). Candida tropicalis
																																	Line: staphylococcus species									I		R	R
																																	Perianal pus:1.P.aeruginosa						s	s			r				s	s
																																	2.Klebsiella species	R	R	R	R	R	R		S	S		R	R	R	I
																																	3.Bacteroides species
184	463-48-89	2023-05-05	2023-06-15	>18	male	AML	no	no	yes	>10	>6month	<1.5	>7days	no	<4	Resp. Tract	infective	not done	not done	not done	PCP+	not done										re admitted	none
184	360-37-21	29/05/2023	2023-06-19	>18	MALE	AML	no	no	yes	>10	<6	<1.5	>7days	yes	<4	Line/Skin and soft tissue	normal	not done	not	not done	not done	not done										re admitted	Line+Peri: Staphylococcus species									R		R	R
185	360-37-21	2023-09-10	2023-10-15	>18	MALE	AML	YES	NO	NO	<10 DAYS	<6 MONTHS	>1.5	7 DAYS	YES	<4	Unknown	NORMAL	not done	not done	not done	not done	not done										re admitted	Blood: staphylococcus species									S		R	S
																																	PICC line tip: pseudomonas species						r		s	s	i		s		s	s
186	463-61-50	2023-06-06	2023-07-05	>18	female	AML	no	no	no	>10 days	> 6months	<1.5	>7days	yes	<4	TB lymphadenitis	normal	not	not	not	not	not										Unknown	picc line: staphylococcus species									S		R	R
																																	PICC LINE: enterococcus species	R								S
187	360-72-14	2023-10-08	2023-09-11	>18 YRS	MALE	ALL	Yes	NO	YES	>10	<6MONTHS	<0.5	>7 DAYS	NO	<4	Skin and soft tissue	NORMAL	NOT	NOT	remarkable	NO	NO										READMITTED	BLOOD CS: KLEBSIELLA SPECIES	R	R		R	R	R		R	R	R	R	S	R	I	Resistant
188	465-93-41	2023-04-08	2023-08-27	<18yrs	Male	AML	Yes	No	No	>10	<6MONTHS	<0.5	>7 DAYS	Yes	None	CLABSI/Resp. Tract/CNS/UTI	Infective	Infective(Brain abscess)	Infective(Meningitis)													Expired	Blood: E.coli	Resistant	Resistant	Resistant	Resistant	Resistant	Resistant		Sensitive	Sensitive		Resistant	Resistant	Resistant	Resistant	Resistant	Sensitive
																																	Urine: Enterococcus species	Resistant									Resistant
																																	Line+Peri: Candida parapsilosis
189	465-71-88	2023-03-08	2023-09-02	<18	MALE	AML	NO	NO	NO	>10	>6	<1.5	>7 DAYS	YES	<4	Resp. Tract/Skin and soft tissue/GI tract	INFECTIVE	B/L FOCAL NEPHRONIA	NOT		NO	NO										READMITTED	Stool: Aeromonas hydrophilia				R	R	S				S		R		S	S
																																	Line: staphylococcus species									R			R
																																	Sputum: A.flavus
																																	Sputum: Pseudomonas flourescens														Intermediate	Intermediate
190	361-01-28	09.10.23	2023-11-27	>18 yrs	MALE	AML	NO	NO	YES	>10 days	>6	0.5	>7	YES	<4	Resp. Tract/GI tract/UTI	INFECTIVE		NOT	HEPATIC STEATOSIS	NO	NO										READMITTED	Staphylococcus species									S		R	R
																																	Urine: Candida auris
																																	Bronch: GeneXpert +
																																	Bronch: Acinetobacter species						Resistant		Resistant	Resistant	Resistant		Resistant		Resistant	Resistant	Resistant
190	291-57-36	2023-12-03	2023-04-08	>18 yrs	Female	AML	Yes	No	No	>10 days	<6 months	<0.5	>7 days	Yes	None	GI tract		Infective														Improved	Amebic Colitis
191	361-02-61	12.10.23	3.11.23	< 18 yrs	Female	AML	Yes	No	No	>10 days	<6 months	<0.5	>7 days	Yes	1	GI tract	Normal															Readmitted	Blood: E.coli	Resistant	Resistant		Resistant	Resistant	Resistant		Resistant	Resistant		Resistant	Resistant	Resistant	Resistant	Resistant	Resistant
																																	Blood: Aeromonas species				Resistant	Resistant	Sensitive	Resistant	Sensitive	Sensitive	Sensitive		Sensitive		Sensitive	Sensitive
192	361-07-59	22.10.23	26.11.23	> 18 yrs	Male	AML	Yes	No	No	>10 days	<6 months	<0.5	>7 days	Yes	None	Skin and soft tissue/UTI				Infective												Improved	Urine: Acinetobacter species						Resistant		Resistant	Intermediate	Resistant		Resistant		Resistant	Resistant	Resistant
193	361-09-63	25.10.23	22.11.23	> 18 yrs	Male	AML	Yes	No	No	>10 days	<6 months	<0.5	>7 days	Yes	None	GI tract/CLABSI	Infective	Infective														Expired	Bronch: A.niger and versicolor
																																	Line+Peri: Acinetobacterspecies	Resistant								Resistant
																																	Blood: Enterococcus species	Resistant								resistant
194	361-17-72	10.11.23	27.11.23	> 18 yrs	Male	AML	Yes	No	No	>10 days	<6 months	<0.5	>7 days	Yes	None	Resp. Tract/UTI/GI tract	Infective															Expired	Urine: Klebsiella species	Resistant	Resistant	Resistant	Resistant		Resistant		Resistant	Resistant	Resistant	Resistant	Resistant	Resistant	Resistant	Resistant
																																	1.Trach: Klebsiella species	Resistant	Resistant	Resistant	Resistant	Resistant	Resistant	Resistant	Resistant	resistant	Resistant		Resistant		Resistant	Resistant
195	359-71-86	2023-01-16	2023-01-19	<18 yrs	Female	ALL	Yes	No	No	<5 days	<6 months	<0.5	>7 days	No	1	GI tract																Readmitted	Stool: Campylobacter species										Resistant
196	359-77-93	2023-01-30	2023-02-09	<18 yrs	Male	ALL	Yes	No	No	>10 days	<6 months	<0.5	>7 days	No	1	Resp. Tract	Infective	Infective			Influenza A, Coronoa virus OC43											Improved
197	461-00-14	1923-09-21	2023-10-30	<18 yrs	Female	ALL	Yes	No	Yes	>10 days	<6 months	<0.5	>7 days	Yes	None	GI tract	Normal	Granuloma (Chest)														Improved	Blood: Staphylococcus species									Sensitive		Sensitive	Sensitive
198	360-05-18	1923-03-15	2023-04-16	>18 yrs	Male	ALL	Yes	No	No	>10 days	<6 months	<0.5	>7 days	Yes	None	GI tract/UTI																Improved	Blood: Staphylococcus species									Sensitive		Sensitive	Resistant
																																	Urine: E.coli	Resistant	Resistant	Resistant	Resistant		Sensitive		Sensitive	Sensitive	Resistant		Sensitive	Sensitive
199	360-05-18	2023-08-07	2023-07-10	>18 yrs	Male	ALL	Yes	No	No	<5 days	<6 months	<0.5	>7 days	No	4	GI tract																Improved	Blood: Streptococcus species	Sensitive			Sensitive
200	462-53-14	1923-03-16	2023-04-01	>18 yrs	Male	ALL	Yes	No	No	>10 days	<6 months	<0.5	>7 days	No	None	Resp. Tract	Infective															Expired	Blood: Staph aureus									Sensitive		Resistant	Sensitive
201	437-41-49	1923-04-25	2023-05-31	<18 yrs	Male	ALL	Yes	No	No	>10 days	<6 months	<0.5	>7 days	Yes	>4	Resp. Tract/Skin and soft tissue	Infective	Infective	Infective													Expired	Tracheal Culture: 1. Stenotrophomonas maltophilia											Sensitive	Sensitive
																																	Tracheal Culture: 2. Pseudomonas aeruginosa						Resistant				Sensitive				Resistant	Intermittent	Sensitive
																																	Swab Culture: Pseudomonas aeruginosa						Sensitive	Sensitive			Sensitive				Sensitive	Sensitive	Sensitive
																																	Blood: PSEUDOMONAS AERUGINOSA						Sensitive				Sensitive				Resistant	Intermittent	Sensitive
202	463-05-94	2023-10-04	2023-04-23	<18 yrs	Male	ALL	Yes	Yes	No	>10 days	<6 months	<0.5	>7 days	Yes	None	GI tract/ENT/CNS/Resp. Tract	Infective	Infective														Expired	Blood (Line): 1 Klebsiella species	Resistant	Resistant	Resistant	Resistant	Resistant	Resistant	Resistant	Sensitive	Sensitive	Sensitive	Sensitive	Sensitive		Sensitive	Sensitive
																																	Nasal: Mucor species
																																	Blood (Line): 2. ENTEROCOCCUS SPECIES	Resistant								Resistant
203	462-99-14	1923-10-20	2023-10-25	<18 yrs	Male	ALL	no	yes	no	5-10 days	> 6months	<1.5	>7 days	no	>4	Skin and soft tissue	pneumonia	not done	not done	not done	not done	not done										Improved	Culture negative, Measles IGM+
204	361-32-80	1923-12-15	2023-12-18	>18 yrs	Male	ALL	yes	yes	no	<5 days	<6months	>1.5	>7 days	no	<4	Resp. Tract	Infective	not done	not done	not done	not done	not done										expired	Aspergillus Niger, Flavus (Bronchial Lavage, tracheal)
																																	Tracheal: Mycobacterium tuberculosis
205	360-99-25	2023-05-10	2023-10-09	<18 yrs	MALE	ALL	Yes	NO	NO	5-10 days	< 6MONTHS	<0.5	>7 days	no	< 4	Unknown	normal	normal	not done	not done	not done	not done										Unknown	Blood: Chyrseobacterium indologenes								Sensitive	Sensitive	Sensitive					Sensitive
206	467-51-37	2023-04-10	2023-10-17	<18 yrs	female	ALL	yes	yes	no	>10 days	<6months	<0.5	>7 days	no	<4	Resp. Tract	infective	not done	not done		not done	not done										Improved	Blood: CANDIDA TROPICALIS
207	466-64-51	1923-09-16	2023-10-20	>18 yrs	male	ALL	yes	No	no	>10 days	>6 months	<1.5	>7 days	picc line	<4	UTI/Eye			Infective orbit													Improved	Blood: Staphylococcus aureus									Sensitive		Resistant
																																	urine: E.coli	Resistant	Resistant	Resistant	Resistant		Resistant		Sensitive	Sensitive	Resistant	Resistant	Resistant	Resistant	Resistant	Resistant
																																	urine: staph aureus									Sensitive		Resistant
208	593-92-05	1923-04-18	2023-06-02	<18 yrs	female	ALL	yes	yes	no	>10 days	>6 months	<0.5	>7 days		<4	Resp. Tract/GI tract/Eye																Improved	Blood: ESCHERICHIA COLI	Resistant	resistant	resistant	resistant	resistant	resistant	resistant	Intermediate	Sensitive	resistant	Resistant	Resistant		Sensitive	Sensitive
																																	Lung tissue:SH (ftg) bdg gm raised, H/P proven
209	360-26-86	2023-06-03	2023-06-06	<18	FEMALE	ALL	NO	NO	no	<5 days	<6 months	>1	>7DAYS	NO	<4	Skin and soft tissue	mild tissue thickening (foot)	not done	not done	not done	not done	not done										Improved	Blood: STAPHYLOCOCCUS SPECIES									Sensitive		Intermediate
209	360-26-86	2023-05-11	2023-05-22	<18	female	ALL	no	no	no	>10 days	<6month	<1	>7DAYS	no	<4	GI tract		not done	not done	normal	not done	not done										Improved	Stool: Aeromonas hydrophilia				Sensitive	Sensitive	Sensitive				Sensitive		Sensitive		Sensitive	Sensitive
209	360-26-86	1923-10-24	2023-10-28	<18	female	ALL	yes	yes	yes	<5 days	>6 Months	>1	>7DAYS	no	>4	Unknown	Normal	not done	not done	not done	not done	not done										Improved	Line: STAPHYLOCOCCUS SPECIES									Sensitive		Resistant	Sensitive
210	460-20-07	2023-12-06	2023-06-16	>18yrs	Male	ALL	Yes	No	Yes	5-10 days	>6 Months	1.5			<4	Resp. Tract					Coronavirus 0C43											Unknown	Tracheal culture: Klebsiella pneumoniae	Resistant	Resistant		Sensitive	Sensitive	Resistant		Sensitive	Sensitive		Sensitive	Sensitive	Sensitive	Sensitive
																																	Tracheal culture: Aspergillus flavus
211	360-30-31	2023-11-05	2023-05-21	<18 yrs	Female	ALL	Yes	No	No	>10 days	<6 Months	<0.5	> 7 days	No	None	Unknown																Improved	Blood: Staphylococcus species (Not Aureus)									Sensitive		Sensitive	Sensitive
212	360-30-48	2023-12-08	2023-08-14	<18 yrs	Male	ALL	Yes	No	No	<5 days	<6 Months	<0.5	> 7 days	Yes	1	Resp. Tract	Infective															Improved	Blood(Line+peri): Enterobacter species	Resistant	Resistant		Sensitive	Resistant	Senstive		Sensitive	Sensitive		Sensitive	Senstitve	Sensitive	Sensitive
213	360-30-48	2023-03-09	2023-09-10	<18 yrs	Male	ALL	Yes	No	No	5-10 days	<6 Months	<0.5	> 7 days	Yes	2	Unknown																Improved	Blood (Line): Pseudomonas aeruginosa						Senstive				Sensitive				Sensitive	Sensitive	Sensitive
214	462-90-57	1923-08-17	2023-08-26	<18 yrs	Male	ALL	Yes	Yes	No	>10 days	<6 Months	<0.5	> 7 days	Yes	3	IE?				Vegetation												Improved	Blood (Line): Candida parapsilosis
215	360-59-71	2023-11-11	2023-12-07	<18 yrs	Male	ALL	Yes	Yes	No	>10 days	<6 Months	<0.5	> 7 days	Yes	3	GI tract																Improved	Blood: Salmonella species	Sensitive			Sensitive						Intermediate		Sensitive			Sensitive
216	674-06-45	1923-08-22	2023-09-15	<18 yrs	Male	ALL	Yes	No	No	>10 days	<6 Months	<0.5	> 7 days	No	2	GI tract																Re-admitted	Culture negative
217	360-73-61	2023-12-08	2023-08-22	<18 yrs	Male	ALL	Yes	No	No	>10 days	<6 Months	<1	> 7 days	Yes	None	CNS																Re-admitted	CSF: Pseudomonas species (S/C)								Sensitive	Sensitive			Sensitive			Sensitive
218	463-48-98	2023-04-09	2023-09-15	<18 yrs	Male	ALL	Yes	No	No	>10 days	<6 Months	<0.5	> 7 days	No	1	Resp. Tract	Infective															Expired	Blood: Staphylococcus species									Resistant		Resistant	Resistant
																																	Trach: Acinetobacter species						Resistant		Resistant	Intermediate	Resistant		Resistant		Resistant	Resistant	Sensitive
219	083-52-35	1923-12-21	2024-01-17	>18	Female	ALL	Yes	Yes	No	>10 days	<6 Months	<0.5	>7 days	Yes	2	UTI																Improved	Urine: BHS group B				Sensitive							Sensitive
220	361-11-01	1923-11-20	2023-12-02	<18	Male	ALL	Yes	No	No	>10 days	< 6 Months	<0.5	>7 days	No	2	Resp. Tract	Infective															Improved	Blood: Staphylococcus aureus									Resistant		Resistant	Sensitive
221	358-06-62	2022-02-04	2022-11-04	<18 yrs	Male	AML	Yes	No	No	5-10 days	>6 months	<0.5	> 7 days	Yes	3	Unknown																Improved	Line: Staphylococcus species								Resistant	Resistant		Resistant	Resistant
[truncated: 48 more columns]

## Sheet: ALL 2023
452-33-65	N
359-71-86	Y	16/1/23
359-71-86	Y/Culture neg	27/1/23
359-71-86	Y/Culture neg	18/2/23
359-71-86	Y/Culture neg	24/2/23
359-71-86	Y/Culture neg	16/3/23
359-77-93	Y/Culture neg	21/1/23
359-77-93	Y	30/1/23
359-77-93	Y/Culture neg	2023-01-04
359-84-94	N
461-00-63	N
310-17-08	N
460-90-67	N
460-90-56	N
460-86-51	N
461-00-14	Y	21/9/23
460-90-86	N
0360-05-18	Y	15/3/23
0360-05-18	Y/Culture neg	15/6/23
0360-05-18	Y	2023-08-07
0360-05-18	Y/Culture neg	21/8/23
462-53-14	Y	16/03/23
437-41-49	Y	25/4/23
463-05-94	Y	2023-10-04
462-90-81	N
463-17-58	N
360-20-25	Y/Culture neg	19/4/23
462-99-14	Y/Culture neg	2023-09-06
462-99-14	Y/Culture neg	2023-02-10
462-99-14	Y	20/10/23
593-92-05	Y	18/04/23
593-92-05	Y/Culture neg	17/6/23
593-92-05	Y/Culture neg	19/7/23
593-92-05	Y/Culture neg	2023-03-08
593-92-05	Y/Culture neg	22/9/23
593-92-05	Y/Culture neg	2023-07-12
360-26-86	Y	2023-11-05
360-26-86	Y/Culture neg	25/5/23
360-26-86	Y	2023-03-06
360-26-86	Y/Culture neg	26/7/23
360-26-86	Y/Culture neg	17/9/23
360-26-86	Y/Culture neg	19/10/23
360-26-86	Y	2023-10-24
360-26-86	Y/Culture neg	26/11/23
460-20-07	Y	2023-12-06
360-30-31	Y	2023-11-05
360-30-31	Y/Culture neg	19/10/23
360-30-48	Y	2023-12-08
360-30-48	Y	2023-03-09
360-37-69	Y/Culture neg	13/07/23
464-33-73	N
000-32-20	N
464-73-50	N
284-02-72	Y/Culture neg	2023-07-08
360-44-55	N
211-98-29	N
462-90-57	Y/Culture neg	2023-01-08
462-90-57	Y	17/08/23
360-57-64	N
700-90-04	N
464-45-23	N
360-59-71	Y	2023-11-11
417-81-09	Y/Culture neg	30/09/23
417-81-09	Y/Culture neg	26/11/23
465-15-29	N
360-69-13	N
360-66-19	N
357-59-42	N
293-08-40	N
594-77-83	N
360-70-66	N
465-15-94	N
674-06-45	Y	22/08/23
674-06-45	Y/Culture neg	2023-05-12
360-73-61	Y	2023-12-08
360-73-61	Y/BH stool	2023-07-09
465-89-70	N
465-76-44	N
360-79-67	N
425-85-07	N
463-48-98	Y	2023-04-09
466-86-14	Y/culture neg	20/09/23
466-86-14	Y/culture neg	29/10/23
360-84-20	Y/culture neg	2023-07-11
360-84-20	Y/culture neg	13/11/23
360-84-20	Y/culture neg	2023-11-12
360-84-20	Y/culture neg	18/12/23
465-93-65	N
083-52-35	Y	21/12/23
466-64-51	Y	16/9/23
467-15-62	Y/culture neg	13/9/23
467-15-62	Y/culture neg	2023-02-11
525-45-20	N
191-57-58	N
467-51-37	Y	2023-04-10
360-96-93	N
360-99-25	Y	2023-05-10
467-92-91	N
467-99-25	N
467-59-75	N
467-15-71	N
361-04-41	Y/culture neg	28/11/23
468-20-69	N
468-25-32	N
0361-11-01	Y	20/11/23
467-92-39	N
800-89-87	N
468-58-39	N
468-58-54	N
469-02-42	N
469-03-96	N
361-26-21	Y/culture neg	24/12/23
469-47-80	Y/culture neg	27/11/23
469-47-57	N
468-58-53	N
469-03-79	N
361-19-93	N
361-32-80	Y	15/12/23
469-47-30	N
461-00-20	Y/culture neg	24/08/23
463-28-77	N

## Sheet: AML 2023
AML MR	FN (Y/N)	1st	2nd	3rd	4th
359-67-68	Y	22-02-23/Culture neg	2023-10-04	25-05-23/Culture neg
460-49-04	Y	2023-09-01
608-64-29	N
359-79-75	N
359-83-16	Y	23-03-23/Culture neg	2023-11-06
0259-02-11	Y	10-02-23/Culture neg	18-07-23	15-10-23
279-66-11	Y	17-02-23/Culture neg	18-03-23/Culture neg
359-91-98	N
359-82-56	Y	19-01-23
359-94-62	N
460-86-57	N
459-54-48	Y	29-12-2022	2023-06-03
359-99-00	Y	2023-05-03	26-04-23/Culture neg
460-20-17	N
700-82-90	N
459-97-45	N
462-32-95	N
462-54-54	N
291-57-36	Y	2023-12-03	30-05-23	25-06-23/Culture neg
360-14-67	N	2023-11-05
360-50-02	N
462-47-56	N
462-84-65	N
462-05-32	N
463-18-07	Y	13-04-23/Culture neg	29-05-23	2023-10-07
504-31-95	N
615-03-74	N
463-48-89	Y	2023-05-05	22/06/2023/Culture neg	17/08/2023/Culture neg	31/10/2023/Culture neg	30/11/2023/Culture neg
463-17-60	N
360-32-24	Y	15/05/2023/Culture neg
360-37-21	Y	29/05/2023	06/07/2023/Culture neg	04/08/2023/Culture neg	2023-09-10
463-56-55	N
463-61-50	Y	2023-06-06
463-48-84	N
464-33-99	N
359-91-34	N
360-56-42	N
115-18-53	N
046-34-17	N
465-83-81	Y	02/08/2023/Culture neg
360-72-14	Y	2023-10-08
465-71-88	Y	2023-03-08	13/10/2023/Culture neg	06/11/2023/Culture neg	05/12/2023/Culture neg
465-93-41	Y	2023-04-08
360-75-87	N
465-60-08	N
466-43-11	N
467-00-27	N
815-25-15	N
109-70-26	N
360-95-18	N
467-14-09	N
507-65-36	N
595-40-87	N
361-00-35	Y	2.11.23/Culture neg
361-00-50	N
0361-01-28	Y	21.12.23/culture neg	09.10.23
361-02-61	Y	21.12.23/Culture neg		24.11.23/Culture neg	12.10.23
361-03-87	N
0361-05-13	N
361-07-59	Y	22.10.23
361-09-63	Y	25.10.23
0361-10-24	N
467-65-48	N
468-24-14	N
467-76-79	N
467-76-81	N
361-17-72	Y	10.11.23
458-29-35	Y	03.11.23/Culture neg
469-02-45	N
361-28-32	y	5/12/23/Culture neg
468-58-33	N
361-35-80	N
452-13-04	N

## Sheet: total FN Epi
Total FN Epi 2020-2024	478
Culture positive	211

## Sheet: ALL Data Analysis
Age Group
Paeds	58
Adults	15
Total	73
Gender
Female	30
Male	43
Total	73
Diagnosis
AML	2
ALL	71
Total	73
Post Chemo
Yes	70
No	3
Total	73
Relapse
Yes	31
No	42
Total	73
Bone marrow transplant
Yes	4
No	69
Total	73
Duration of Hospitalization
< 5 days	20
5-10 days	19
> 10 days	34
Total	73
Duration of Disease
< 6 months	26
> 6 months	46
Un Known	1
Total	73
Severity of Neutropenia
<0.5	62
<1	6
< 1.5	5
Total	73
Duration of Neutropenia
< 7 days	5
> 7 days	68
Total	73
Lines
Yes	51
No	19
Unknown	3
Total	73
No. of Previous Admission in a year
1	7
2	10
3	4
4	4
>4	40
None	7
Un Known	1
Total	73
Primary Site of Infection
Cellulitis	1
Cellulitis/Abscess	1
Ear&Resp	1
Eye/ENT	2
GI	5
GI Tract	5
GI/ENT/Resp	1
GI/Myositis	1
GI/Resp/Line	1
Line	2
Line colonization	1
Lines	2
Resp. Tract	10
Respiratory	3
Respiratory & GI	3
Respiratory & line	1
Respiratory,GI &Urine	1
Spine	1
Urinary tract	1
Un Known	30
Total	73
Name of Organism Isolated
Acinetobacter species	4
Aerococcus species	1
Aspergillus flavus	1
C.parapsilosis	3
Candida albicans	1
Candida guillermondii	1
Candida krusei	1
C.auris	1
C. tropicalis	1
Cornyae species	1
E.coli	17
Entercoccus species	5
Enterobacter species	4
Klebsiella pneumoniae	5
Pseudomonas aeruginosa	10
Pseudomonas species	2
Rahnella aquatilis	1
Rhizobium radiobacter	1
Salmonella group B	1
Salmonella species	3
Staphylococcus aureus	4
Staphylococcus species	26
Streptococcus mitis	1
Streptococcus species	1

## Sheet: S.Species
	Amikacin	Gentamicin	Levofloxacin	Cotrimoxazole/ Trimethoprim	Tetracycline	Chloramphenicol	Vancomycin	Erythromycin	Clindamycin	Penicillin	Oxacillin
Resistant	3	2	10	8	1	0	0	10	5	10	23
Sensitive	20	20	5	2	3	9	9	0	5	0	1
Intermediate		1	1	0	0	0	0	0	0	0

## Sheet: E.coli
E.coli (17)	Ampicillin	Amoxicillin/Clavulanate	Cefixime	Ceftriaxone	Cefuroxime	Piperacillin/Tazobactam	Aztreonam	Amikacin	Gentamicin	Ciprofloxacin	Levofloxacin	Cotrimoxazole/ Trimethoprim	Ertapenem	Imipenem	Meropenem	Nalidixic Acid	Ofloxacin	Nitrofurantoin	Fosfomycin	Colistin
Resistant	15	8	13	14	12	10	10	2	6	15	5	14	3	6	7	2	2	0	1	0
Sensitive	0	5	0	0	0	4	1	13	8	0	1	0	4	7	6	0	0	1	5	0
Intermediate	0	1	0	0	0	1	0	0	0	0	0	0	0	0	0	0	0	1	0	7
Blanks	2	0	4	3	5	2	6	2	2	2	11	3	10	4	4	15	15	15	11	10

## Sheet: Pseudo
Pseudomonas aeruginosa (10)	Piperacillin/Tazobactam	Aztreonam	Amikacin	Gentamicin	Ciprofloxacin	Imipenem	Meropenem	Tobramycin	Colistin	Ceftazidime
Resistant	3	2	1	2	2	3	3	0	0	3
Sensitive	7	5	9	8	7	7	7	7	0	6
Intermediate	0	0	0	0	1	0	0	0	3	0
Blank	0	0	0	0	0	0	0	3	7	1

## Sheet: Kleb
K.pneumoniae(5)	Amoxicillin/Clavulanate	Cefixime	Ceftriaxone	Cefuroxime	Piperacillin/Tazobactam	Aztreonam	Amikacin	Gentamicin	Ciprofloxacin	Levofloxacin	Cotrimoxazole/ Trimethoprim	Ertapenem	Imipenem	Meropenem	Fosfomycin	Colistin
Resistant	4	3	4	4	2	3	1	3	3	0	4	0	2	2	1	0
Sensitive	1	1	1	1	3	1	4	2	1	1	1	1	3	3	1	0
Intermediate	0	0	0	0	0	0	0	0	0	0	0	0	0	0	0	2
Blanks	0	1	0	0	0	1	0	0	1	4	0	4	0	0	3	3

## Sheet: ws
Medical Record	Age	Gender	Diagnosis	Post Chemo	Relapse	Bone marrow transplant	Duration of Hospitalization	Duration of Disease	Severity of Neutropenia	Duration of Neutropenia	Lines	No. of Previous Admission in a year	Primary Site of Infection	Xray	CT	MRI	Ultrasound	Respiratory Panel	Meningitis/Encephalitis Panel	Ciprofloxacin	Voriconazole	Acyclovir	Cotrimoxazole/ Trimethoprim	Fluconazole	Vancomycin	Meropenem	Amikacin	Pip / Taz	Treatment Outcome	Name of Organism Isolated	Ampicillin	Amoxicillin/Clavulanate	Cefixime	Ceftriaxone	Cefuroxime	Piperacillin/Tazobactam	Aztreonam	Amikacin	Gentamicin	Ciprofloxacin	Levofloxacin	Cotrimoxazole/ Trimethoprim	Ertapenem	Imipenem	Meropenem	Tobramycin	Tetracycline	Nalidixic Acid	Ofloxacin
425-98-32	<18 yrs	Female	AML	Yes	No	No	>10 days	<6 months	<0.5	>7 days	PICC	2	Resp. Tract	Normal	Normal			none	none				Yes	Yes			>7 days		Improved	Streptococcus species	Sensitive			Sensitive													Resistant		Resistant
409-01-46	>18 yrs	Male	ALL	Yes	Yes	Yes	>10 days	> 6 months	<0.5	>7 days	PICC	>4	Unknown	Normal						>7 days	>7 days				<7days				Improved
203-65-05	<18 yrs	Male	ALL	Yes	Yes	Yes	>10 days	> 6 months	<0.5	>7 days	PICC	>4	Unknown	Normal			Normal				>7 days		Yes		>7 days				Re admitted	Staphylococcus species								Sensitive	Sensitive		Resistant	Resistant					Resistant
411-09-56	>18 yrs	Male	ALL	Yes	Yes	No	>10 days	> 6 months	<0.5	>7 days	Un Known	3	Unknown	Normal						>7 days	>7 days				>7 days				Expired	Klebsiella pneumoniae	Resistant	Resistant	Resistant	Resistant	Resistant	Resistant	Resistant	Resistant	Resistant	Resistant		Resistant		Resistant	Resistant
294-23-55	<18 yrs	Female	ALL	Yes	Yes	No	>10 days	> 6 months	<0.5	>7 days	CVC	>4	Unknown	Normal									Yes	Yes			<7 days		Improved	Pseudomonas aeruginosa						Sensitive	Sensitive	Sensitive	Sensitive	Sensitive				Sensitive	Sensitive
354-47-18	<18 yrs	Male	ALL	Yes	No	No	>10 days	<6 months	<1.5	<7 days	PICC	>4	Unknown														<7 days		Improved
355-30-13	<18 yrs	Female	ALL	Yes	Yes	No	>10 days	<6 months	<0.5	>7 days	PICC	None	Resp. Tract	Normal	Infective		Normal	Negative		<7days			Yes	Yes	>7 days				Improved	E.Coli, S.aureus,	Resistant	Sensitive	Resistant	Resistant	Resistant	Sensitive	Resistant	Sensitive	Sensitive	Resistant	Sensitive	Resistant	Sensitive	Sensitive	Sensitive		Resistant
425-98-32	<18 yrs	Female	ALL	Yes	No	No	>10 days	<6 months	<0.5	>7 days	PICC	>4	Resp. Tract	Infective	Infective			Coronavirus 0C43					Yes	Yes	>7 days		<7 days		Improved
354-12-48	>18 yrs	Male	ALL	Yes	Yes	No	>10 days	> 6 months	<0.5	>7 days	PICC	>4	Unknown	Normal							<7days				<7days		>7 days		Improved	Staphylococcus species								Sensitive	Sensitive		Resistant	Resistant					Resistant
404-77-39	>18 yrs	Male	ALL	Yes	Yes	No	>10 days	> 6 months	<0.5	>7 days	CVC	>4	GI Tract		Infective					>7 days			Yes	Yes	>7 days				Re admitted	Staph. aureus, E.coli and Enterococcus species	Resistant								Resistant
433-38-36	>18 yrs	Male	ALL	Yes	Yes	No	<5 Days	<6 months	<1	>7 days	None	None	GI Tract	Normal										Yes	<7days				Unknown	Salmonella species	Sensitive		Sensitive	Sensitive						Sensitive		Sensitive
584-34-68	<18 yrs	Female	ALL	Yes	No	No	>10 days	> 6 months	<0.5	>7 days	None	>4	Cellulitis/Abscess		Infective						>7 days				>7 days		>7 days		Re admitted	Pseudomonas aeruginosa						Sensitive	Sensitive	Sensitive	Sensitive	Sensitive				Sensitive	Sensitive	Sensitive
355-65-27	<18 yrs	Female	ALL	Yes	No	No	5-10 days	<6 months	<0.5	>7 days	PICC	1	Unknown	Normal						no	no		yes(1 month)	no	yes ( 13 days)		yes( 5 days)		Improved	Staphylococcus species								Sensitive	Sensitive		Resistant	Resistant					Sensitive
294-23-55	<18 yrs	Male	ALL	Yes	Yes	No	>10 days	> 6 months	<0.5	<7 days	PICC	>4	Unknown	Normal			Normal			Yes - 6 days	No		No	No	Yes		Yes-8 days		Expired	E.coli, C. tropicalis and Staph species	Resistant	Resistant	Resistant	Resistant	Resistant	Resistant	Resistant	Sensitive	Resistant	Resistant		Resistant	Resistant	Sensitive	Sensitive
521-00-19	<18 yrs	Male	ALL	Yes	No	No	5-10 days	<6 months	<0.5	>7 days	PICC	1	Unknown	Normal						Yes-7 days	No		Yes	No	Yes		Yes		Improved	Pseudomonas aeruginosa and Staphylococcus species						Sensitive	Sensitive	Sensitive	Sensitive	Sensitive				Sensitive	Sensitive
428-60-83	<18 yrs	Male	ALL	Yes	No	No	5-10 days	<6 months	<0.5	>7 days	PICC	>4	Resp. Tract	Normal	Infective					No			Yes	< 7 days	Yes		Yes		Re admitted	Klabsiella pneumonia	Sensitive	Resistant	Sensitive	Sensitive	Sensitive	Sensitive	Sensitive	Sensitive	Sensitive	Sensitive		Sensitive		Sensitive	Sensitive
585-71-70	<18 yrs	Female	ALL	Yes	No	No	>10 days	<6 months	<0.5	>7 days	None	2	Unknown	Normal	Normal					> 7 days	No		Yes	< 7 days	Yes		Yes		Expired	Candida guillermondii
433-38-36	>18 yrs	Male	ALL	Yes	Yes	No	>10 days	> 6 months	<0.5	>7 days	None	2	Unknown	Normal						No	No		No	> 7 days	Yes		Yes		Expired	Pseudomonas Aeroginosa/ Staphylococcus species						Sensitive	Sensitive	Sensitive	Sensitive	Sensitive				Sensitive	Sensitive	Sensitive
0435-05-02	<18 yrs	Male	ALL	Yes	Yes	No	5-10 days	<6 months	<0.5	<7 days	PICC	2	Unknown							< 7 days	No		Yes	> 7 days	Yes		Yes		Improved	Staphylococcus species ( not AUREUS)								Sensitive	Sensitive		Resistant	Resistant
434-72-86	>18 yrs	Male	ALL	No	No	No	<5 Days	<6 months	<0.5	<7 days	None	1	Unknown	Normal						> 7 days	No		No	> 7 days	No		No		Improved	E.Coli	Sensitive	Sensitive	Resistant	Resistant	Resistant	Resistant	Sensitive	Sensitive	Sensitive	Resistant		Resistant	Resistant		Resistant
436-36-60	>18 yrs	Male	ALL	Yes	No	No	>10 days	<6 months	<0.5	>7 days	None	None	Unknown	Normal						No	< 7 days		No	> 7 days	Yes		No		Expired	Klebsiella pneumoniae	Resistant	Resistant	Resistant	Resistant	Resistant	Resistant	Resistant	Sensitive	Resistant	Resistant		Resistant		Resistant	Resistant
400-66-58	<18 yrs	Male	ALL	Yes	Yes	No	>10 days	> 6 months	<0.5	>7 days	PICC	None	Eye/ENT		Infective					> 7 days	> 7 days		Yes	> 7 days			Yes		Re admitted	Burkholderia cepacia and Streptococcus mitis	Intermediate			Sensitive							Sensitive	Sensitive			Resistant		Sensitive		Sensitive
356-15-64	<18 yrs	Female	ALL	Yes	No	No	<5 Days	<6 months	<0.5	>7 days	None	1	GI Tract							No	No		No	> 7 days			Yes		Re admitted	Candida albicans
355-42-28	<18 yrs	Male	ALL	Yes	No	No	5-10 days	> 6 months	<0.5	>7 days	None	>4	Resp. Tract		Infective					No	No		Yes	No	No		Yes		Unknown	Pseudomonas species											Sensitive	Sensitive			Resistant
355-66-37	<18 yrs	Female	ALL	Yes	No	No	5-10 days	> 6 months	<0.5	>7 days	None	4	Lines							No	No		Yes	No	No		Yes		Re admitted	Pseudomonas species											Sensitive	Sensitive			Resistant
400-66-58	<18 yrs	Male	ALL	Yes	Yes	No	>10 days	> 6 months	<0.5	>7 days	PICC	1	Eye/ENT		Infective					No	> 7 days		Yes	> 7 days	Yes				Improved	Aspergillus flavus
2562190	<18 yrs	Female	ALL	Yes	No	No	<5 Days	<6 months	<0.5	>7 days	None	2	Unknown							< 7 days			Yes	No	Yes				Improved	Staphylococcus Aureus						Sensitive		Sensitive	Sensitive		Sensitive	Resistant					Sensitive
355-79-05	<18 yrs	Male	AML	Yes	No	No	<5 Days	<6 months	<1	>7 days	PICC	2	Unknown							No			Yes	No	No		Yes		Improved	Staphylococcus species (not aureus)						Sensitive		Sensitive	Sensitive	Sensitive	Sensitive	Resistant		Sensitive	Sensitive
435-47-38	<18 yrs	Male	ALL	Yes	No	No	<5 Days	> 6 months	<1.5	>7 days	PICC	4	Unknown	Normal						> 7 days	No		Yes	No	Yes		No		Improved	[STAPHYLOCOCCUS SPECIES (NOT AUREUS)]								Sensitive	Sensitive		Sensitive	Resistant
356-21-90	<18 yrs	Female	ALL	Yes	No	No	<5 Days	> 6 months	<1.5	>7 days	PICC	>4	Resp. Tract	Normal						No	No		Yes	No	No		Yes		Improved	[STAPHYLOCOCCUS SPECIES (NOT AUREUS)]								Sensitive	Sensitive	Sensitive	Sensitive	Resistant
439-89-67	<18 yrs	Male	ALL	Yes	No	No	<5 Days	> 6 months	<0.5	>7 days	PICC	3	Resp. Tract	Infective						No			Yes	No	Yes		No		Improved	[STAPHYLOCOCCUS SPECIES (NOT AUREUS)]								Sensitive	Sensitive		Resistant	Resistant					Resistant
356-21-90	<18 yrs	Female	ALL	Yes	No	No	<5 Days	<6 months	<1	>7 days	None	>4	Resp. Tract	Infective	Normal					< 7 days			Yes	No	No		Yes		Improved	[STAPHYLOCOCCUS SPECIES (NOT AUREUS)]								Sensitive	Resistant		Resistant	Resistant					Resistant
441-05-83	>18 yrs	Male	ALL	Yes	Yes	No	>10 days	> 6 months	<0.5	>7 days	PICC	>4	GI Tract	Normal						> 7 days	No		No	No	No		No		Improved	ESCHERICHIA COLI	Resistant	Sensitive	Resistant	Resistant	Resistant	Resistant	Resistant	Resistant	Sensitive	Resistant		Resistant		Sensitive	Sensitive
356-40-85	<18 yrs	Male	ALL	Yes	No	No	>10 days	> 6 months	<0.5	>7 days	PICC	>4	Resp. Tract	Infective	Infective			Negative		> 7 days	No		Yes	No					Expired	Acinetobacter Species & Pseudomonas aeruginosa						Resistant		Resistant	Resistant	Resistant		Resistant		Resistant	Resistant
436-37-83	<18 yrs	Female	ALL	Yes	Yes	No	5-10 days	> 6 months	<0.5	<7 days	PICC	>4	Unknown							No	< 7 days		Yes	> 7 days			Yes		Improved	Klebsiella pneumoniae & Enterobacter species	Resistant	Resistant	Resistant	Resistant	Resistant	Sensitive	Resistant	Sensitive	Resistant	Resistant		Resistant		Sensitive	Sensitive
441-05-83	<18 yrs	Male	ALL	Yes	Yes	No	5-10 days	> 6 months	<0.5	>7 days	PICC	>4	Resp. Tract	Infective						No	No		No	> 7 days			Yes		Improved	Staphylococcus species								Sensitive	Sensitive		Sensitive	Resistant
583-02-44	<18 yrs	Female	ALL	Yes	No	No	>10 days	<6 months	<0.5	>7 days	PICC	3	Unknown				Normal			< 7 days	No		No	No			Yes		Improved	Candida parapsilosis and E.coli
358-75-98	<18 yrs	Female	ALL	Yes	Yes	No	<5 Days	> 6 months	<0.5	>7 days	None	None	GI Tract	Infective											Yes				Unknown	E.coli	Resistant	Resistant	Resistant	Resistant	Resistant	Sensitive	Resistant	Sensitive	Sensitive	Resistant		Resistant	Sensitive	Sensitive	Sensitive
436-37-83	<18 yrs	Female	ALL	Yes	Yes	No	>10 days	> 6 months	<0.5	>7 days	PICC	>4	Unknown	Infective	Infective					> 7 days	> 7 days		Yes	> 7 days			Yes		Re admitted	E.coli	Resistant	Resistant	Resistant	Resistant	Resistant	Resistant	Resistant	Sensitive	Resistant	Resistant		Resistant		Sensitive	Sensitive
357-16-17	<18 yrs	Male	ALL	Yes	No	No	>10 days	<6 months	<1.5	>7 days	None	None	Urinary Tract	Infective	Infective		Infective								Yes				Improved	C.auris, Enterococcus species, P.aeruginosa, S.aureus	Resistant					Resistant	Resistant	Sensitive	Resistant	Resistant				Resistant	Resistant	Sensitive
441-05-83	<18 yrs	Male	ALL	Yes	Yes	No	<5 Days	> 6 months	<0.5	>7 days	PICC	>4	Lines							>7 days	No	No	Yes	No	?		Yes	?	Improved	Staphylococcus species								Sensitive	Sensitive		Sensitive	Resistant					Resistant
																														Cornyae species
357-28-70	<18 yrs	Female	ALL	Yes	No	No	5-10 days	<6 months	<0.5	>7 days	None	None	Unknown	Normal															Improved	Acinetobacter species						Sensitive		Sensitive	Sensitive	Sensitive		Sensitive		Sensitive	Sensitive		Sensitive
														Infective															Improved	Aerococcus species	Resistant														Resistant
357-02-36	<18 yrs	Male	ALL	Yes	No	No	>10 days	> 6 months	<0.5	>7 days	PICC	4	GI/Resp/Line	Infective															Improved	1.Staphylococcus species								Sensitive	Sensitive		Sensitive	Resistant
																														2.Entercoccus species	Resistant								Sensitive
357-40-64	>18 yrs	Male	ALL	Yes	No	No	<5 Days	Un known	<0.5	>7 days	None	Un Known	Cellulitis				Infective												Expired	E.coli	Resistant	Resistant	Resistant	Resistant	Resistant	Resistant		Sensitive	Sensitive	Resistant		Resistant		Resistant	Resistant
583-02-44	<18 yrs	Female	ALL	Yes	No	No	5-10 days	<6 months	<0.5	>7 days	Yes	>4	Respiratory		Infective														Improved	1.C.parapsilosis
																													Improved	2.Acinetobacter species						Sensitive		Sensitive	Sensitive	Sensitive		Resistant		Sensitive	Sensitive	Sensitive
812-41-83	<18 yrs	Male	ALL	Yes	No	No	<5 Days	> 6 months	<0.5	>7 days	Yes	4	Line																	1. Enterobacter species	Resistant	Resistant	Sensitive	Sensitive	Sensitive	Sensitive	Sensitive	Sensitive	Sensitive	Sensitive		Sensitive		Sensitive	Sensitive
																														2. Staphylococcus species								Sensitive	Sensitive		Sensitive	Sensitive					Sensitive
357-39-44	<18 yrs	Male	ALL	Yes	No	No	5-10 days	<6 months	<1	>7 days	Yes	>4	Unknown				Normal												Re admitted	1.C.parapsilosis
0435-05-21	<18 yrs	Male	ALL	No	Yes	No	5-10 days	> 6 months	<1.5	>7 days	None	>4	Respiratory & GI	Infective															Improved	P.aeruginosa						Sensitive	Sensitive	Sensitive	Sensitive	Sensitive				Sensitive	Sensitive	Sensitive
441-05-83	<18 yrs	Male	ALL	Yes	Yes	No	>10 days	> 6 months	<0.5	>7 days	PICC	>4	Respiratory		Infective														Re admitted	E.coli	Resistant	Sensitive	Resistant	Resistant	Resistant	Intermediate	Resistant	Sensitive	Sensitive	Resistant	Resistant	Resistant		Sensitive	Sensitive
357-04-75	<18 yrs	Male	ALL	Yes	No	No	>10 days	> 6 months	<0.5	>7 days	PICC	>4	Respiratory & GI		Infective			1.Human Rhinovirus											Re admitted	1. Blood E.coli	Resistant	Resistant	Resistant	Resistant	Resistant	Resistant	Resistant	Sensitive	Sensitive	Resistant	Resistant	Resistant		Resistant	Resistant	Sensitive
																		2.Parainfluenza virus 2&3												2.Trach P.aeruginosa						Sensitive		Sensitive	Sensitive	Sensitive				Sensitive	Sensitive	Sensitive
357-42-85	<18 yrs	Female	ALL	Yes	No	No	5-10 days	<6 months	<0.5	>7 days	PICC	2	Line																Improved	1.Acinetobacter species						Sensitive		Sensitive	Sensitive	Sensitive		Sensitive		Sensitive	Sensitive
																														2.Rahnella aquatilis	Resistant	Sensitive	Sensitive	Sensitive	Sensitive	Sensitive	Sensitive	Sensitive	Sensitive	Sensitive		Sensitive		Sensitive	Sensitive
																														3.Rhizobium radiobacter									Resistant	Intermediate		Resistant		Sensitive	Sensitive
																														4.Enterobacter species	Resistant	Sensitive	Sensitive	Sensitive	Sensitive	Sensitive	Sensitive	Sensitive	Sensitive	Sensitive		Sensitive		Sensitive	Sensitive
357-39-44	<18 yrs	Male	ALL	Yes	No	No	>10 days	<6 months	<0.5	>7 days	PICC	>4	Unknown																Improved	1.Staphylococcus species								Sensitive	Sensitive		Intermediate	Resistant					Senstivie
355-79-05	<18 yrs	Male	ALL	No	No	No	5-10 days	> 6 months	<0.5	>7 days	None	>4	Unknown																Improved	Gram negative rod (FTG)
442-73-44	<18 yrs	Female	ALL	Yes	No	No	5-10 days	> 6 months	<0.5	>7 days	PICC	>4	Line colonization	Normal															Improved	Staphylococcus species								Sensitive	Sensitive		Sensitive	Sensitive					Sensitive
0356-05-29	>18 yrs	Male	ALL	Yes	Yes	No	>10 days	> 6 months	<1	>7 days	PICC	3	Unknown	Normal															Improved	Staphylococcus species								Sensitive	Sensitive		Resistant	Resistant					Resistant
448-55-93	<18 yrs	Male	ALL	Yes	Yes	No	>10 days	> 6 months	<0.5	>7 days	PICC	>4	Respiratory & GI			Infective														1.Staphylococcus aureus								Sensitive	Sensitive		Resistant	Resistant					Sensitive
																														2.E.coli	Resistant	Intermediate		Resistant	Resistant	Sensitive		Sensitive	Sensitive		Resistant	Resistant	Sensitive	Sensitive
0448-05-12	<18 yrs	Female	ALL	Yes	No	No	5-10 days	<6 months	<0.5	>7 days	PICC	2	Unknown																Improved	Staphylococcus species								Sensitive	Sensitive		Resistant	Resistant
355-65-27	<18 yrs	Female	ALL	Yes	Yes	No	>10 days	> 6 months	<1	>7 days	PICC	>4	Unknown	Normal															Improved	Staphylococcus species								Sensitive	Sensitive		Resistant	Resistant
436-37-83	<18 yrs	Female	ALL	Yes	Yes	Yes	<5 Days	> 6 months	<0.5	>7 days	None	>4	Ear&Resp	Infective															Improved	Ear: Staphylococcus aureus								Sensitive	Sensitive		Resistant	Resistant					Sensitive
442-82-82	>18 yrs	Female	ALL	Yes	Yes	No	>10 days	> 6 months	<0.5	>7 days	PICC	>4	Respiratory,GI &Urine	Infective															Expired	Urine: E.coli	Resistant	Resistant	Resistant	Resistant		Resistant		Sensitive	Sensitive	Resistant	Resistant	Resistant	Resistant	Resistant	Resistant			Resistant	Resistant
																														Blood 1.E.coli
																														2.Enterococcus species	Sensitive								Sensitive
557-56-91	<18 yrs	Female	ALL	Yes	Yes	No	>10 days	> 6 months	<0.5	>7 days	PICC	2	Respiratory & line	Infective	Infective														Expired	1.E.coli	Resistant	Resistant	Resistant	Resistant	Resistant	Resistant	Resistant	Resistant	Resistant	Resistant	Resistant	Resistant		Resistant	Resistant
																														2.Candida krusei
																														3.Klebsiella pneumoniae	Resistant	Sensitive		Resistant	Resistant	Sensitive		Sensitive	Sensitive		Sensitive	Resistant	Sensitive	Sensitive	Sensitive
206-26-69	<18 yrs	Female	ALL	Yes	Yes	No	>10 days	> 6 months	<0.5	>7 days	PICC	2	Spine			Infective													Improved	Staphylococcus species								Resistant	Resistant		Resistant	Resistant
357-04-75	<18 yrs	Male	ALL	Yes	No	No	5-10 days	> 6 months	<0.5	>7 days	PICC	>4	GI	Normal															Expired	Staphylococcus species								Sensitive	Intermediate		Resistant	Sensitive
355-65-27	<18 yrs	Female	ALL	Yes	yes	No	5-10 days	> 6 months	<0.5	>7 days	PICC	>4	GI																Improved	Staphylococcus species								Resistant	Sensitive		Resistant	Resistant
448-33-54	<18 yrs	Male	ALL	Yes	No	No	<5 Days	<6 months	<0.5	>7 days	PICC	>4	GI																Improved	1.P.aeruginosa						Resistant		Sensitive	Sensitive	Sensitive				Sensitive	Sensitive	Sensitive
																														2.E.coli	Resistant	Resistant	Resistant	Resistant	Resistant	Resistant	Resistant	Sensitive	Resistant	Resistant		Resistant		Resistant	Resistant
357-39-44	<18 yrs	Male	ALL	Yes	No	No	<5 Days	> 6 months	<0.5	>7 days	PICC	>4	Unknown																Re-admitted	1. Staphylococcus species									Sensitive		Resistant	Resistant					Sensitive
445-05-39	>18 yrs	Female	ALL	Yes	No	No	>10 days	> 6 months	<0.5	>7 days	None	>4	GI/ENT/Resp		Infective	Infective													Improved	Streptococcus mitis	Resistant			Resistant													Resistant		Resistant
452-90-45	<18 yrs	Male	ALL	Yes	Yes	No	>10 days	> 6 months	<0.5	>7 days	PICC	1	GI/Myositis		Infective	Infective	Infective												Improved	Stool. Salmonella species	Resistant		Resistant	Resistant						Intermediate		Resistant		Sensitive
453-16-59	<18 yrs	Male	ALL	Yes	No	No	<5 Days	<6 months	<0.5	>7 days	Un known	1	GI				Normal												Improved	Stool. Salmonella group B	Resistant		Sensitive	Sensitive						Intermediate		Sensitive
149-26-60	>18 yrs	Female	ALL	Yes	No	No	<5 Days	> 6 months	<0.5	>7 days	PICC	>4	GI																Re-admitted	Urine: E.coli	Resistant	Sensitive	Resistant	Resistant		Sensitive		Sensitive	Resistant	Resistant		Resistant	Sensitive					Resistant	Resistant
																														Blood. Enterobacter species	Resistant	Resistant		Sensitive	Resistant	Sensitive		Sensitive	Sensitive		Sensitive	Resistant	Sensitive	Sensitive
400-66-58	<18 yrs	Male	ALL	Yes	Yes	Yes	<5 Days	> 6 months	<0.5	>7 days	Un known	>4	Unknown																Improved	Samonella species	Sensitive		Sensitive	Sensitive						Sensitive		Sensitive
446-29-17	>18 yrs	Male	ALL	Yes	No	No	5-10 days	> 6 months	<0.5	>7 days	CVP	>4	Respiratory	Infective															Re-admitted	Trach+Blood: P.aeruginosa						Sensitive	Resistant	Sensitive	Sensitive	Intermediate				Resistant	Resistant	Sensitive
0448-05-12	<18 yrs	Female	ALL	Yes	No	No	<5 Days	> 6 months	<0.5	>7 days	PICC	>4	Unknown																Re-admitted	Staphylococcus species								Resistant	Sensitive		Resistant	Resistant
[truncated: 46 more columns]

[truncated: 7 more sheets: AML DATA, AML Data analysis, S.Spp, E.colii, Enterococcus spp both, Pseud, Klebs]
